# Modelling rheumatoid arthritis: A hybrid modelling framework to describe pannus formation in a small joint

Fiona R Macfarlane<sup>1,\*</sup>, Mark AJ Chaplain<sup>1</sup>, Raluca Eftimie<sup>2</sup>

1. School of Mathematics and Statistics, University of St Andrews, UK;

2. Département de Mathématiques, University of Franche-Comté, Besançon, France;

## Abstract

Rheumatoid arthritis (RA) is a chronic inflammatory disorder that causes pain, swelling and stiffness in the joints, and negatively impacts the life of affected patients. The disease does not have a cure yet, as there are still many aspects of this complex disorder that are not fully understood. While mathematical models can shed light on some of these aspects, to date there are not many such models that can be used to better understand the disease. As a first step in the mechanistic understanding of RA, in this study we introduce a new hybrid mathematical modelling framework that describes pannus formation in a small proximal interphalangeal (PIP) joint. We perform numerical simulations with this new model, to investigate the impact of different levels of immune cells (macrophages and fibroblasts) on the degradation of bone and cartilage. Since many model parameters are unknown and cannot be estimated due to a lack of experiments, we also perform a sensitivity analysis of model outputs to various model parameters (single parameters or combinations of parameters). Finally, we connect our numerical results with current treatments for RA, by discussing our numerical simulations in the context of various drug therapies using, for example, methotrexate, TNF-inhibitors or tocilizumab, which can impact different model parameters.

## 1 Introduction

Rheumatoid arthritis (RA) is a chronic inflammatory disorder that affects over 1% of the worldwide population [73]. The characteristics of RA include persistent inflammation of joints, which contributes to the degradation of cartilage, and damage to the bone(s) within the joint [15, 19]. Along with symptoms related to inflammation within joints, RA can increase the risk of other health issues such as cardiovascular events [19, 75], reduced cognitive function in the brain, fibrotic disease in the lungs, osteoporosis and a greater risk of cancers [35]. The main symptoms of RA include inflammation, pain, swelling and stiffness of joints, fatigue and weight loss. Generally, the smaller joints in the hands and feet are most likely to be affected [75], for example, proximal interphalangeal (PIP) joints, which are the middle joints on the non-thumb fingers of the hand, are most commonly affected [33, 34, 86, 88]. A key aspect of RA progression within a joint is the formation of a ‘pannus’ from the abnormally growing synovial membrane. The pannus is made up of mainly fibroblast-like synoviocytes (FLSs) and macrophage-like synoviocytes (MLSs). Through the production of inflammatory cytokines the proliferation, migration and cytokine secretion of these cell types increases leading to further inflammation. These cells also produce matrix degrading enzymes, like MMPs, which can breakdown cartilage and bone within a joint. In this work, we focus on these key features of pannus formation and growth and the subsequent cartilage and bone degradation. In the following subsection we provide further biological detail of these specific mechanisms. For more robust reviews of the biology of RA we direct the reader to the following papers [28, 35].

### 1.1 Key biological background

The synovial membrane is a soft connective tissue which lines synovial joints and allows for smooth movement through the secretion of lubricating synovial fluid [19, 28]. This well vascularised tissue consists of an intimal layer of evenly dispersed cells and a sub-lining comprised of extracellular matrix interspersed with collagen fibrils and other matrix proteins [79]. The porous structure of the synovial membrane allows for the diffusion of nutrients, oxygen and chemokines into the joint [8]. In a healthy joint, the intimal layer of the membrane is generally 1-2 cells thick and consists of fibroblast-like synoviocytes (FLSs) and macrophage-like synoviocytes (MLSs) evenly

---

\*Corresponding author: [frm3@st-andrews.ac.uk](mailto:frm3@st-andrews.ac.uk)

distributed and in equal amounts [8, 79]. Following the onset of RA, the synovial membrane expands through various inflammatory mechanisms, this growing membrane is known as a ‘pannus’ and can behave similarly to a locally invasive tumour spreading within the joint [79]. Through both an increase in the proliferation of FLSs and the infiltration of immune cells, such as bone-marrow derived macrophages, the synovial membrane can expand to around 10-20 cells in thickness [17, 29, 35, 79, 97]. In this work, we focus on resident macrophages, or macrophage-like synoviocytes, and resident fibroblasts, or fibroblast-like synoviocytes, which form the majority of the pannus. However, the pannus can also consist of other immune cell types, including leukocytes, plasma cells, T cells and mast cells. Pannus formation and growth is controlled through the expression of pro-inflammatory cytokines by the cells, promoting further inflammation of the synovial membrane. The cytokines involved are vast and varied, including those with roles in immune cell recruitment, immune cell activation, chemotaxis of cells and degradation of the cartilage/bone. There can be a high level of heterogeneity in macrophage origin and function in the context of RA [97], as well as FLS phenotypes and cytokine profiles [21]. In general, the pannus is heterogeneous consisting of diverse cellular and molecular signatures [79]. In recent years, distinct patterns have been recognised primarily according to composition, organisation and localisation of cellular infiltrates [79]. As a first approach, we consider homogenous cell populations whereby each cell within a population will exhibit the same phenotypic characteristics. However, we do implement stochasticity within the system through our modelling choices.

Cartilage is a connective tissue consisting of chondrocytes which produce a dense extra cellular matrix (ECM). Matrix metalloproteinases (MMPs) and tissue inhibitors of metalloproteinases (TIMPs) mediate cartilage destruction and are produced by B cells, FLSs and macrophages in the RA setting [17, 19, 28, 35, 105]. Cells within the pannus can also stimulate cartilage degradation via direct cell contact mechanisms [19, 29]. After cartilage has been damaged the bone underneath can become exposed. Bone erosion can be induced by cytokines that promote osteoclasts within the bone. In health, osteoclasts inhibit osteoblasts which produce new bone. In RA, the function of osteoclasts is increased, reducing the levels of new bone being formed leading to a reduction in bone formation [17, 28, 35]. As an initial formulation, for simplicity, we will consider both total cartilage and total bone densities rather than the individual components of each of these tissues.

Once initiated the outcomes of RA cannot be reversed, however disease progression can be slowed and the symptoms of the disease can be reduced through a variety of treatment approaches. There are several classes of RA treatment drugs including non-steroidal anti-inflammatory drugs (NSAIDs), steroids and disease modifying anti-rheumatic drugs (DMARDs). These drugs can be used alone or in conjunction with other treatment approaches. Biological DMARDs are generally used in conjunction with conventional DMARDs, increasing their efficacy, and are considered to have a strong benefit-to-risk profile [71, 92]. However, a large number of patients (approx. 40%) do not respond to the therapy, while others respond initially and then lose response over time [22]. Switching biologics is one approach considered for the patients with inadequate response to the initial treatment, although the second biologic might not be more effective than the first one [22]. For a full description of the drugs used in rheumatoid arthritis treatment we refer the reader to the following papers [38, 75, 87]. We discuss some specific drugs and the effects they have in the RA context in Section 3.4.

## 1.2 Previous mathematical descriptions of RA

Mathematical modelling is a useful tool to aid in the understanding of biological process at multiple spatial and temporal scales. In a recent review paper [58], we have considered existing mathematical models that aim to capture the mechanisms of rheumatoid arthritis in a variety of contexts. We refer the reader to the review paper for the full details, however we provide a short summary of the mathematical approaches reviewed here.

### 1.2.1 Summary of models reviewed in [58]

Systems of ordinary differential equations (ODEs), which are non-spatial deterministic continuous equations that describe the time evolution of a variable of interest, are the most common modelling approach used to describe the evolution of RA. Single compartment ODE models have been used to model joint erosion [103], the interactions between generic pro- and anti-inflammatory cytokines [6], the role of the cytokine TNF- $\alpha$  [42, 63], the interactions of immune cells within the RA environment and the drug Tocilizumab [77]. More complex, multi-compartment ODE approaches have also been used to consider the circadian dynamics involved in the progression of rheumatoid arthritis [82] and the inflammatory and invasive processes occurring at the cartilage-pannus interface [85]. Furthermore, a number of ODE based approaches consider the pharmacokinetics and pharmacodynamics of various drugs used to treat RA [45, 46, 52, 54, 67, 72, 74, 95].

To account for spatio-temporal features of RA, systems of partial differential equations (PDEs) have been utilised. PDEs are deterministic continuous equations that can describe the spatial and temporal evolution of a variable of interest. PDEs are less commonly used to describe RA specific processes, in comparison to ODEs. For example, Moise *et. al.* [66] consider a three-compartment model to describe the spatio-temporal interactions between immune cells, cytokines and drugs in the synovial membrane, synovial fluid and cartilage of a joint.

Deterministic methods such as ODEs and PDEs cannot capture the potential variability or stochasticity within a biological system. Stochastic mathematical and computational models describe the interactions between the different components of the system, or the transitions between different states of these components as probabilistic. Such models have been mainly applied in the context of treatment decisions [90], to analyse RA incidence rates [84], or to predict radiological progression within RA [39,101]. Moreover, a subset of stochastic Markov chain models have focused on assessing the cost-effectiveness of single or combined RA treatments [47, 50, 89, 89, 94].

### 1.2.2 Further stochastic and hybrid (deterministic-stochastic) modelling approaches

The few models existent in the literature are mainly deterministic and are given by differential equations. However it has been suggested that accounting for stochasticity within RA may be key in understanding the evolution of the disease [24,28] and predicting the success of RA treatments [26]. Along with the stochastic models described in Section 1.2.1, a small number of studies have considered probabilistic Boolean network models for RA [65,104].

A different approach to incorporate stochasticity at a cellular level within mathematical models is to use an individual-based (IB) (or agent-based) modelling approach [10,100]. This approach allows each cell to be described as an individual agent which follows a set of predetermined rules. These agents reside in a defined spatial domain. This domain can be constrained as a lattice, where agents are restricted to moving between lattice positions, or more realistically an off-lattice approach can be utilised where agents have freedom in direction of movement. Off-lattice individual-based modelling has been used in multiple areas of mathematical biology research including modelling the cellular immune response to viruses [7] and cancer [61]. Individual-based models can be computationally expensive especially when modelling a large number of agents. This expense can be reduced by using a hybrid modelling approach. For example, when modelling a chemical we may not necessarily be interested in modelling each individual molecule but the total local concentration instead. To model these more continuous aspects a deterministic approach can be used, where the total local concentration is described rather than each molecule, this can be viewed as a tissue-level approach. To allow us to consider both the stochastic cellular level scale and deterministic tissue level dynamics of the system we can use a hybrid multiscale modelling approach [62]. To model the deterministic components we can use classical methods such as differential equations. Hybrid approaches have been used to model various biological phenomena such as monocyte migration in the vasculature [5], the cellular immune response to sepsis [20], inflammation in chronic obstructive pulmonary disease [9] or various mechanisms of cancer growth and development [57,60,80,83]. In a similar way, in the context of rheumatoid arthritis, using multi-scale hybrid modelling approaches may be valuable in modelling disease progression and predicting the success of RA treatment.

These hybrid modelling approaches allow for the dynamics of single cells within a system to be investigated while chemical concentrations and tissue-level effects are modelled deterministically. This is useful in the context of RA as it has been found that there exists high levels of phenotypic and spatial heterogeneity of cells within the synovial membrane [69]. Moreover, understanding these single cell phenomena further has been highlighted as an important step in the identification of treatment targets [13,99,102]. To investigate these single cell dynamics, we propose a hybrid (stochastic-discrete) modelling method would be appropriate to describe the cellular dynamics in the progression of RA.

## 1.3 Overview of paper

Building upon previous on-lattice hybrid models to describe interacting cell and chemical populations [12,59], we develop an off-lattice hybrid model as a first step towards building a more realistic model of arthritic destruction within a small PIP joint. More specifically, we incorporate the dynamics of two resident cell populations, fibroblasts (or fibroblast-like synoviocytes) and macrophages (or macrophage-like synoviocytes) through a stochastic off-lattice individual-based modelling approach. The dynamics of cartilage and bone density, along with the evolution of MMPs are described via a deterministic PDE approach. In the model we consider the simplified interactions of these components which can lead to destruction of cartilage and subsequently the bone within the joint. The methods used to implement each of the mechanisms described are those which could be used to include the necessary biological

detail as the framework is improved upon in future iterations of the model. The paper is structured as follows. In Section 2, we describe the details of the framework and how each biological mechanism is described mathematically. In Section 3, as an example we highlight some initial results of the framework and perform a sensitivity analysis to investigate the role of the parameters in the RA system. We additionally describe how the framework could be related to current rheumatoid arthritis treatments. Finally in Section 4 we discuss the key outputs of our framework and their biological relevance, the requirements to validate the framework and the plans for developing the framework further.

## 2 The discrete model

In this section we introduce the hybrid modelling framework used to describe pannus formation in a joint affected by rheumatoid arthritis. In the framework we consider 5 components: bone and cartilage densities, individual resident fibroblasts (or fibroblast-like synoviocytes) and resident macrophages (or macrophage-like synoviocytes) and the degrading proteases, matrix metalloproteinases (MMPs). Note, we include only fibroblasts and macrophages as they contribute to the majority of the pannus, however further cell types could be considered in future iterations of the modelling framework. We use an off-lattice individual-based modelling approach to describe the dynamics of the cells, coupled with discretised PDEs to model cartilage density, bone density and MMP concentration. In Section 2.1, we describe the set-up of the initial spatial domain to replicate a PIP joint. The mathematical methods used to describe both fibroblast and macrophage dynamics are presented in Section 2.2. Section 2.3 contains the mechanisms used to describe the evolution of MMPs in the system. The methods used to describe both cartilage and bone density are given in Section 2.4. Finally, we describe how the on and off-lattice components of the model are coupled in Section 2.5.

### 2.1 Set-up of the domain

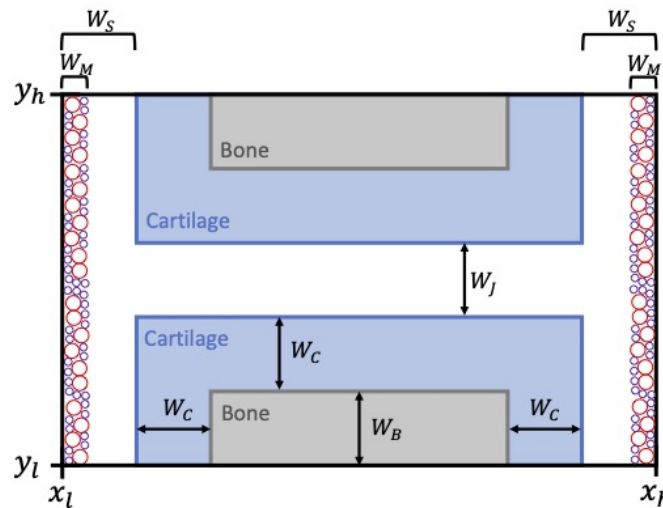

Figure 1: The initial spatial domain of the hybrid model. Shaded grey area represents the areas where bone is initially present, while shaded blue represents the areas where cartilage is initially present. The red and purple circles represent macrophages and fibroblasts, respectively. Note, that the initial position of both cell types of cells is randomised, so the positions here are just an example. The white space represents synovial fluid in which cells can freely move and proliferate, *e.g.*, essentially free space in the system. Each of the parameters  $W$  are shown on the diagram represent the length, height or width of each of the areas within the domain. Note, the diagram is not to scale.

We consider a 2D spatial domain with  $x \in [x_l, x_h]$  and  $y \in [y_l, y_h]$ . A schematic diagram of the spatial domain and initial condition is provided in Figure 1. As described in Section 1.1, small joints in the hand are most commonly affected by rheumatoid arthritis and can be affected in early stages of the disease. Therefore we formulate the model in the context of rheumatoid arthritis within a small PIP joint. There would be no difficulty in reframing the model in the context of other RA infected joints. To replicate a small joint we consider the joint space to contain two bone ends, surrounded by cartilage with a small space between the two bones. As a simplification, in the model we consider

the bone and cartilage domains to be rectangular initially. In healthy joints, the synovial membrane is around 1-2 cells thick consisting of macrophages and fibroblasts which are evenly distributed and in equal amounts [8, 79]. Therefore, we position macrophages and fibroblasts randomly in two layers at the boundaries of the domain, where the width of the membrane is approximately 2 cells thick. To define the spatial domain, we consider the width, length or height of each of these areas by defining the following parameters  $W$ , the descriptions of these parameters are available in Table 1.

| Symbol | Description                                                |
|--------|------------------------------------------------------------|
| $W_B$  | the height of bone protruding into the domain              |
| $W_C$  | the width of the cartilage that surrounds the bone         |
| $W_J$  | the width of the joint space between the two bone ends     |
| $W_M$  | the initial width of the synovial membrane                 |
| $W_S$  | the space between the cartilage and the edge of the domain |

Table 1: Descriptions of the parameters used to set-up the initial spatial domain of the hybrid model as shown in Figure 1.

## 2.2 Cell dynamics

Fibroblasts and macrophage populations are included in the model using an off-lattice individual-based modelling approach. We track the total number of fibroblasts and macrophages over time, denoted by  $N_F(t)$  and  $N_M(t)$ , respectively. To take into account the physical size of the cells, each cell within both populations is tracked by the spatial position of the cell centre and the radius of the cell. To allow for simplicity we consider all cells to be perfectly spherical (*i.e.* the radius of the cell consistent) and we further consider that the cell size does not change over time. We consider homogeneous populations of fibroblasts and macrophages, that have the radii  $R_F$  for the fibroblasts and  $R_M$  for the macrophages.

Initially, we randomly place  $N_F(0)$  fibroblasts and  $N_M(0)$  macrophages in the areas denoted by width  $W_M$ , as shown in Figure 1. To ensure physical space is taken into account, for each cell a desired initial position is chosen then checked for overlap with previously placed cells, cartilage, bone or the domain boundary as we consider a volume-exclusion process, whereby only one cell can occupy a particular area of free space. If there is overlap, a new position is chosen for that cell and the process repeats, until all cells are placed.

To replicate growth and invasion of the pannus into the joint space, we allow both cell types to undergo mechanisms of random motion/migration and proliferation within the individual-based model, as described in the following subsections. For simplicity, we consider both the fibroblast and macrophage populations to be homogeneous, that is each fibroblast will have the same potential to divide, die or migrate and similarly, each macrophage will have the same potential to divide, die or migrate. Furthermore, we impose zero-flux boundary conditions ensuring all cells remain within the spatial domain. That is, we consider only cells that reside within the simulated joint and omit the influx or recruitment of external immune cells into the domain.

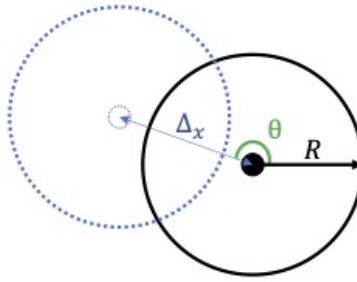

Figure 2: Schematic of the off-lattice cell movement mechanism. The solid black circle represents the initial cell position where the cell has radius  $R$ . A desired position is chosen by selecting a random angle  $\theta \in [0, 2\pi]$  and then placing the cell centre at a distance of  $\Delta_x$  from the original position in the direction  $\theta$ . The desired position (blue dashed circle) is chosen as the cell's updated position if no other cells, cartilage or bone overlap this spatial position. If this position does overlap the cell movement process is aborted.

**Cell movement** We incorporate random cell movement for both fibroblasts and macrophages using the same mechanism and allow different probabilities of movement for each cell type. At every time-step each cell can move randomly with probability,  $\lambda_F$  or  $\lambda_M$ , if a fibroblast or macrophage, respectively. If the cell is permitted to move, then a new direction is chosen from an angle  $\theta$  between 0 and  $2\pi$  for the cell to move in, as shown in Figure 2. The new position is calculated as a jump of length  $\Delta_x$ , to ensure proper scaling of movement probabilities. The movement to this desired position is only permitted if the new position is within the boundary, does not overlap with any other cells or with cartilage/bone density. If any of these properties prevent movement, the movement jump is aborted.

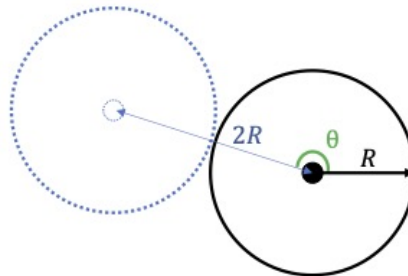

Figure 3: Schematic of the off-lattice cell division mechanism. The solid black circle represents the original cell position where the cell has radius  $R$ . The cell will divide into two identical daughter cells, one cell will remain on the original cell's position and the other will be placed at a desired position adjacent to the original cell's position. A desired position for the second daughter cell is chosen by selecting a random angle  $\theta \in [0, 2\pi]$  and then placing the cell centre at a distance of  $2R$ , *i.e.*, the cell's diameter, from the original position in the direction  $\theta$ . The desired position (blue dashed circle) is chosen as the daughter cell's position if no other cells, cartilage or bone overlap this spatial position. If this position does overlap the cell division process is aborted and the original cell remains.

**Cell proliferation** We incorporate cell division and death for both fibroblasts and macrophages using the same mechanism and allow different probabilities of division and death for each cell type. It has been shown that a major factor controlling cell division is a random event controlled by a transition probability [91]. Therefore, to incorporate cell division into our model we allow for this random event by allocating a probability of division at each time-step to each cell. This random event occurs once the cell has reached a minimum size, however for simplicity in this model we do not incorporate cell cycle or cell size, these details could be explicitly considered in future developments of the model. At every time-step, each cell has a probability of dividing given by  $\alpha_F$  or  $\alpha_M$ , for fibroblasts or macrophages respectively. If the cell is permitted to divide, then the cell splits into two identical daughter cells. One is placed on the parent cell's original position and the other is placed in a chosen position adjacent to this, as shown in Figure 3. This adjacent position is chosen from an angle  $\theta$  between 0 and  $2\pi$ . The new position is set at a length of twice the radius of the cell  $R_F$  or  $R_M$ , *i.e.*, the cell's diameter. This new cell is only placed on this position if the position is

within the boundary, does not overlap with any other cells or with cartilage/bone density. If any of these properties prevent division, the process is aborted and the parent cell remains in the original position.

Furthermore, at every time-step, each cell has a probability of dying. The probability of dying is given by  $\kappa_F$  or  $\kappa_M$ , for fibroblasts or macrophages respectively. If the cell is assigned to die at a given time-step, it is simply removed from the simulation instantly.

### 2.3 MMP dynamics

Since matrix metalloproteinases (MMPs) produced by fibroblasts and macrophages mediate cartilage destruction and bone destruction we include the dynamics of MMPs in to the mathematical model. We describe the dynamics of MMPs in the system as a deterministic process, as we are interested in the total local concentration of MMPs rather than each individual molecule. We use a similar approach to Moise *et. al.* [66] and include the diffusion, production and decay of MMPs. As MMPs are secreted by both fibroblasts and macrophages, we consider the density of cells to contribute to the local MMP concentration. In the RA setting, tissue inhibitors of metalloproteinases (TIMPs) regulate the activity of MMPs, however for simplicity, we take into account the actions of TIMPs implicitly by including a decay rate of MMPs and imposing a local limit on the concentration of MMPs at any spatial position to ensure the local concentration is bounded. Mathematically these assumptions can be captured by the PDE,

$$\frac{\partial CMMP}{\partial t} = \lambda_{CMMP} \nabla^2 CMMP + (\beta_F \rho_F + \beta_M \rho_M) (1 - CMMP) - \kappa_{CMMP} CMMP, \quad (2.1)$$

where  $CMMP = CMMP(\mathbf{x}, t)$  is the local concentration of MMPs at position  $\mathbf{x}$  at time  $t$ ,  $\lambda_{CMMP}$  is the diffusivity of MMPs,  $\beta_F$  and  $\beta_M$  are the rates of production of MMPs by fibroblasts and macrophages, respectively,  $\rho_F = \rho_F(\mathbf{x}, t)$  and  $\rho_M = \rho_M(\mathbf{x}, t)$  are the cell densities of fibroblasts and macrophages, respectively, and  $\kappa_{CMMP}$  is the decay rate of MMPs. We solve the PDE with zero-Neumann boundary conditions to allow all MMPs to remain within the domain. We note that as MMPs are a small molecule, MMPs can enter the areas of cartilage and bone density freely and there are no spatial restrictions on the MMPs diffusion within the domain.

### 2.4 Cartilage and Bone dynamics

In the model, we are interested in the destruction of cartilage and bone by MMPs. Therefore, we consider the density of cartilage and bone within the spatial domain over time. For simplicity, we do not include the biological components of cartilage or bone, and consider these tissues as a whole. We model the evolution of cartilage and bone through the PDEs,

$$\frac{\partial \rho_C}{\partial t} = -\kappa_{\rho_C} \rho_C CMMP, \quad (2.2)$$

$$\frac{\partial \rho_B}{\partial t} = -\kappa_{\rho_B} \rho_B CMMP, \quad (2.3)$$

where  $\rho_C = \rho_C(\mathbf{x}, t)$  and  $\rho_B = \rho_B(\mathbf{x}, t)$  are the densities of cartilage and bone, respectively. Here,  $\kappa_{\rho_C}$  and  $\kappa_{\rho_B}$  are the rates of degradation of cartilage and bone by MMPs,  $CMMP = CMMP(\mathbf{x}, t)$ , respectively. We solve these equations with zero-Neumann boundary conditions to ensure all components remain within the spatial domain. As an initial formulation of the model, we do not allow for the growth of cartilage or bone which could be incorporated by adding more levels of complexity.

### 2.5 Linking the individual-based and PDE components of the model

As the modelling framework utilises a hybrid approach (*i.e.* a stochastic off-lattice model for cell dynamics and deterministic PDEs for MMPs, cartilage and bone evolution) we have to ensure that the two approaches allow for interactions between the stochastic and deterministic components. For numerical simulations of the model we discretise Equations (2.1)-(2.3) such that each of these densities is defined on a discrete lattice, the discretisation method is provided in A. The description of how the off-lattice components are then coupled with the discrete lattice components are described in the following paragraphs.

**Secretion of MMPs** In Equation (2.1) at the tissue-level scale, the production of MMPs is dependent on the density of fibroblasts and macrophages. At the cellular level scale, this translates to the secretion of MMPs by each of the cells. For simplicity, we assume that cells produce MMPs at the centre position of the cell. To allow the

concentration of MMPs to remain on our discretised grid, we calculate the nearest grid-position to the cell centre, and add the desired MMP concentration to this grid position.

**Volume-exclusion** To ensure that the cells do not move or divide onto areas of the domain that contains bone or cartilage we need to evaluate the position of the whole cell on the grid. If no cartilage or bone degradation has occurred we simply check whether the new desired position is within  $\pm R$  (radius) of the initial areas of the domain containing cartilage or bone, as depicted in Figure 1. That is, we check any part of the cells circumference will be within the initial cartilage or bone domain areas. If bone or cartilage degradation has occurred then we want to ensure that the cell can now move into this free space. To do this we find equally distributed points on each cell's circumference and then calculate the nearest grid-position of each of these points. We then check whether there is cartilage or bone present on those positions, to ensure the cell is able to move. Note, here we make the assumption that a cell can only inhabit an area of space if the cartilage and bone density is zero, however in future work we could allow cells to inhabit areas if these densities are below some threshold value, if appropriate.

### 3 Numerical simulations and sensitivity analysis

To visualise the hybrid modelling framework developed in Section 2 we run numerical simulations using MATLAB, the details of the explicit method used to solve the PDEs is given in A. Every iteration of the simulation is run with the same initial condition. Each simulation is run over a 20 day time-frame as differences in the outcome of the model between runs with different parameter set-ups could be observed over this time-frame. A schematic overview of the key components, biological mechanisms and key parameters in the model is provided in Figure 4. To run these simulations we have to choose values for the parameters within the model, we display these parameters in Table 2 . We then provide some example results of the model focusing on the aggressiveness of pannus growth through varying the division probabilities of macrophages and fibroblasts in Subsection 3.2. To investigate the role of each parameter within the model we perform a one-at-a-time sensitivity analysis in Subsection 3.3. Different therapeutic treatments can target specific mechanisms within the formation of the pannus and destruction of the joint, implicitly we can relate these therapeutics to varying single parameters within the model or varying combinations of parameters, we discuss this in Subsection 3.4.



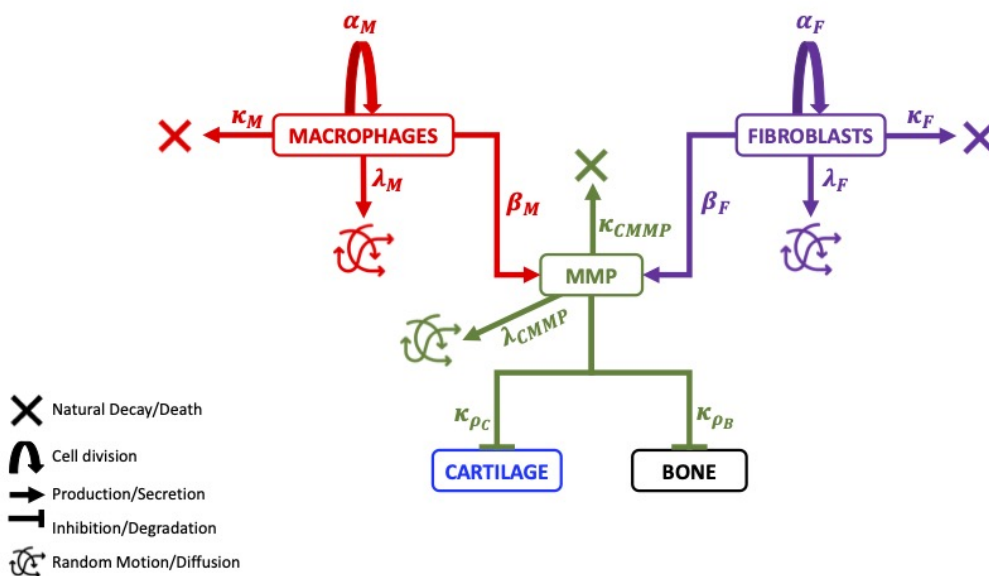

Figure 4: Schematic describing the components, mechanisms and parameters included in the hybrid model. Here,  $\alpha_F$  and  $\alpha_M$  represent the probability of cell division for fibroblasts and macrophages, respectively, while  $\kappa_F$  and  $\kappa_M$ , represent the probability of cell death. The probability of cell movement for fibroblasts and macrophages is given by  $\lambda_F$  and  $\lambda_M$ , respectively. The MMP secretion rates of fibroblasts and macrophages are given by  $\beta_F$  and  $\beta_M$ , respectively. The MMPs decay naturally at the rate  $\kappa_{CMMP}$  and can diffuse in the spatial domain at the rate  $\lambda_{CMMP}$ . The MMPs additionally degrade both cartilage and bone at the rates  $\kappa_{\rho_C}$  and  $\kappa_{\rho_B}$ , respectively.

### 3.1 Parameterising the model

To parameterise the model, where possible, we use data from the literature and previous mathematical models. The parameters used in the numerical simulations of the model, unless stated otherwise are those shown in Table 2. We provide in C a full description of the choices of these parameters and how they are calculated.

### 3.2 Increasing the division probabilities of macrophages and fibroblasts

As an example of the simulation results of the model we consider the cases where all parameter values are taken to be the values given in Table 2 (the baseline case). The simulation results for the first 20 days are shown in Figure 5. We plot the spatial distributions of cells, bone and cartilage at four time-points in the left-hand panels. We additionally plot the average number of fibroblasts, average number of macrophages, average global MMP concentration, average global cartilage density and average global bone density from 5 runs of the simulation in the right-hand plots. Here, global concentration/density refers to the sum of the MMP concentration or cartilage/bone densities across the whole spatial domain. We show the standard deviation between the 5 runs as the shaded area on each plot. We can see from these results that in this case, the cartilage density does decrease as MMP concentration increases, however no bone degradation occurs. In all of the line plots the standard deviation between runs is relatively low, especially in MMP concentration and the cartilage density plots.

| Symbol            | Description                                              | Value                                                              |
|-------------------|----------------------------------------------------------|--------------------------------------------------------------------|
| $\Delta_{tchem}$  | time-step length for deterministic components            | $1 \times 10^{-4}$ days                                            |
| $\Delta_{tcells}$ | time-step length for stochastic components               | $1 \times 10^{-2}$ days                                            |
| $\Delta_x$        | grid-step length in $x$ direction                        | $1 \times 10^{-3}$ cm                                              |
| $\Delta_y$        | grid-step length in $y$ direction                        | $1 \times 10^{-3}$ cm                                              |
| $W_B$             | initial thickness of bone                                | 0.1 cm                                                             |
| $W_C$             | initial thickness of cartilage                           | 0.04 cm [86]                                                       |
| $W_J$             | initial width of joint space                             | 0.01 cm [33, 88]                                                   |
| $W_M$             | initial width of synovial membrane                       | 0.004 cm [79]                                                      |
| $W_S$             | initial width between edge of domain and the cartilage   | $2W_M$ cm                                                          |
| $x_l$             | minimum $x$ value of domain                              | 0 cm                                                               |
| $x_h$             | maximum $x$ value of domain                              | 0.3 cm                                                             |
| $y_l$             | minimum $y$ value of domain                              | 0 cm                                                               |
| $y_h$             | maximum $y$ value of domain                              | $W_J + 2W_C + 2W_B$ cm                                             |
| $\alpha_F$        | probability of a fibroblast dividing                     | $0.33\Delta_{tcells}$ [27, 66]                                     |
| $\alpha_M$        | probability of a macrophage dividing                     | $0.33\Delta_{tcells}$                                              |
| $\beta_F$         | concentration of MMPs produced by fibroblasts            | $13.912 \times 10^{-5}\Delta_{tcells}$ [66]                        |
| $\beta_M$         | concentration of MMPs produced by macrophages            | $5.2717 \times 10^{-5}\Delta_{tcells}$ [66]                        |
| $\kappa_F$        | probability of a fibroblast undergoing apoptosis         | $0.03\Delta_{tcells}$ [66, 70]                                     |
| $\kappa_M$        | probability of a macrophage undergoing apoptosis         | $0.033\Delta_{tcells}$ [41, 66]                                    |
| $\lambda_F$       | probability of a fibroblast moving via undirected motion | $\frac{\Delta_{tcells}}{\Delta_x^2} 8.64 \times 10^{-7}$ [66, 106] |
| $\lambda_M$       | probability of a macrophage moving via undirected motion | $\frac{\Delta_{tcells}}{\Delta_x^2} 8.64 \times 10^{-7}$ [66, 106] |
| $N_F(0)$          | initial number of fibroblasts                            | 200 cells.                                                         |
| $N_M(0)$          | initial number of macrophages                            | 200 cells.                                                         |
| $R_F$             | radius of a single fibroblast                            | $6.5 \times 10^{-4}$ cm [31].                                      |
| $R_M$             | radius of a single macrophage                            | $10.5 \times 10^{-4}$ cm [48]                                      |
| $\lambda_{CMMP}$  | diffusivity of MMPs                                      | $6.59 \times 10^{-2}$ cm <sup>2</sup> day <sup>-1</sup> [66, 106]  |
| $\kappa_{CMMP}$   | natural decay rate of MMPs                               | 0.138 day <sup>-1</sup> [66, 98]                                   |
| $\kappa_{\rho_C}$ | decay rate of cartilage by MMPs                          | $\frac{4.44 \times 10^3}{1.15} \rho_C(0)$ day <sup>-1</sup> [66]   |
| $\kappa_{\rho_B}$ | decay rate of bone by MMPs                               | $0.1 \kappa_{\rho_C}$                                              |

Table 2: The parameters used in numerical simulations of the model. Unless a reference is given the parameters are estimated or calculated. Descriptions of how each value is chosen are provided in C.

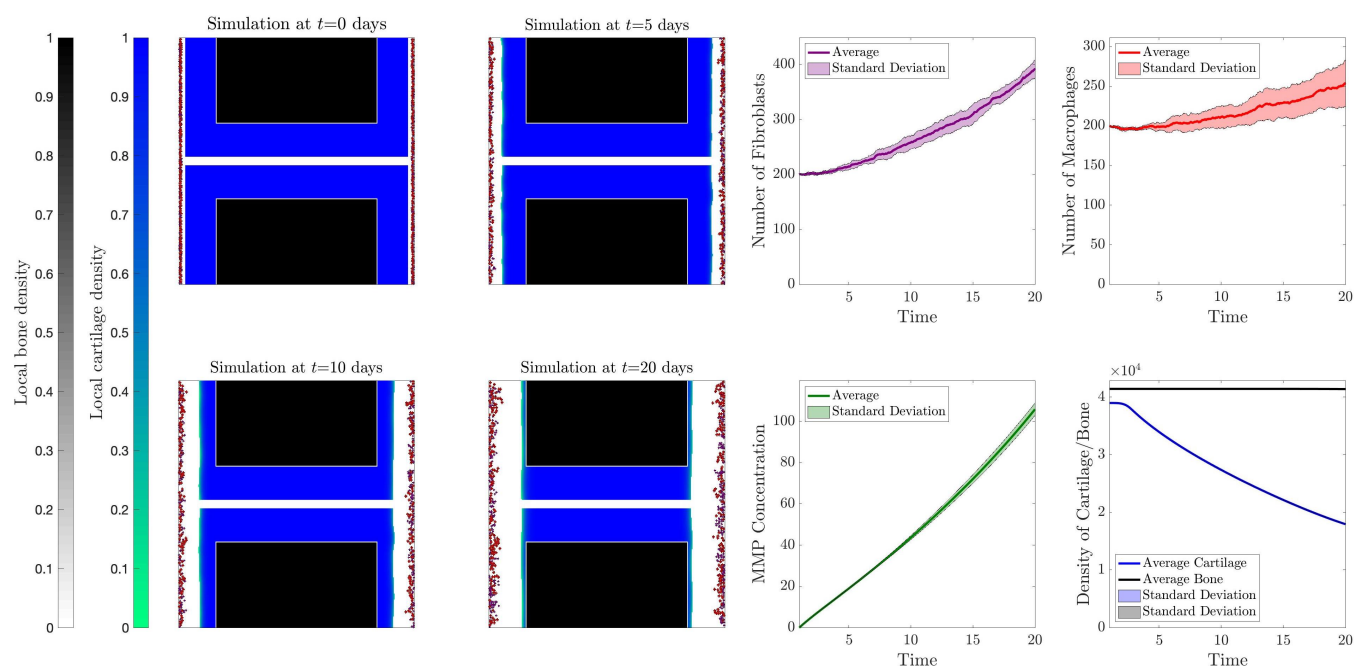

Figure 5: Example results where all parameters are those given in Table 2. **Left-hand plots:** Panels show the visualisation of spatial results of one of the runs of the simulation at the time-points  $t=\{0,5,10,20\}$  days. The red dots are macrophages, the purple dots are fibroblasts, the blue-green surface is cartilage density and the black-grey surface is bone density. White space represents space in which cells can move freely in the joint, *e.g.*, synovial fluid. **Right-hand plots:** The plots show the cell number, concentration or density over time averaged over 5 simulation runs with the standard deviation shaded. The number of fibroblasts is given in purple, the number of macrophages in red, the global MMP concentration in green, the global cartilage density in blue and the global bone density in black.

We can also consider cases where we expect slightly more immune cells in the affected joint system, to replicate a case where immune activity has been amplified. As an example, in Figure 6 we show results of the case where immune cell proliferation is increased ten-fold. From these results, we observe a larger increase in the number of fibroblasts and macrophages over time as expected. We also see that the concentration of MMPs is increased in comparison to the case shown in Figure 5. In this case, the cartilage degradation is more severe than the previous case, however the bone density is retained. Once again, we observe low standard deviation between runs for all of the line plots.

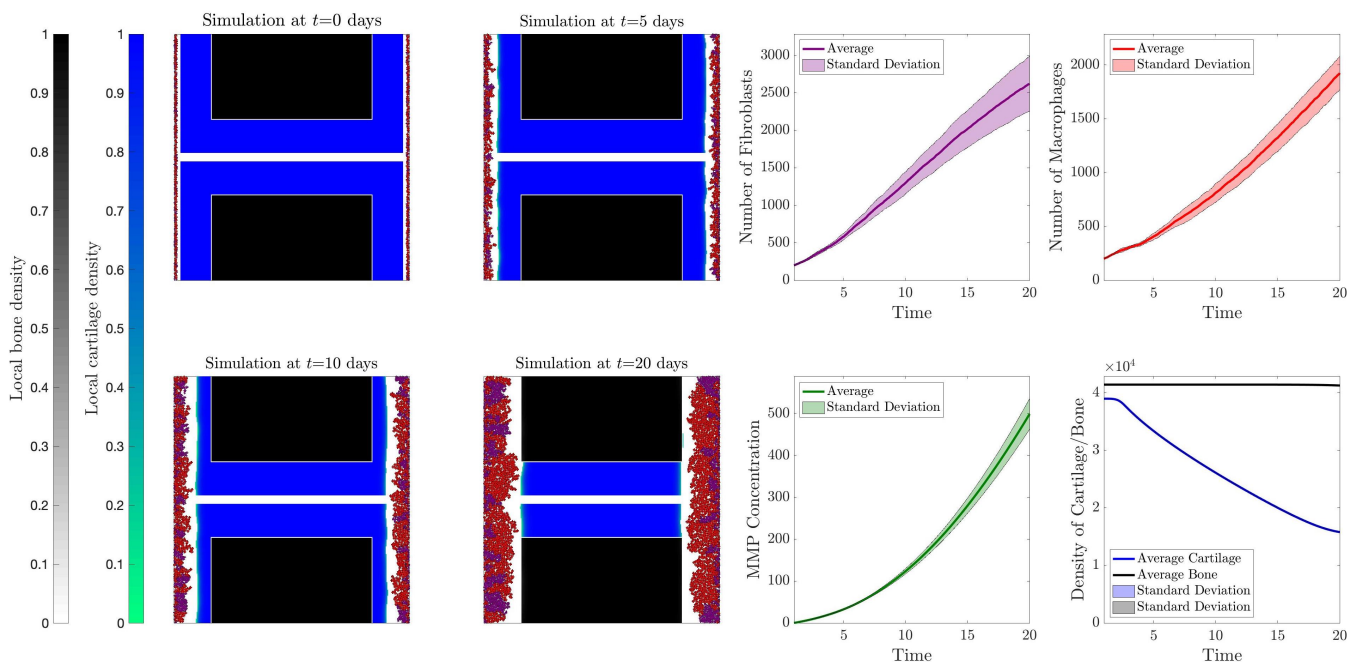

Figure 6: Example results where all parameters are those given in Table 2 except  $\alpha_F$  and  $\alpha_M$  which are ten times the given value. **Left-hand plots:** Panels show the visualisation of spatial results of one of the runs of the simulation at the time-points  $t=\{0,5,10,20\}$  days. The red dots are macrophages, the purple dots are fibroblasts, the blue-green surface is cartilage density and the black-grey surface is bone density. White space represents space in which cells can move freely in the joint, *e.g.*, synovial fluid. **Right-hand plots:** The plots show the cell number, concentration or density over time averaged over 5 simulation runs with the standard deviation shaded. The number of fibroblasts is given in purple, the number of macrophages in red, the global MMP concentration in green, the global cartilage density in blue and the global bone density in black.

Finally, we consider a case where we expect many more immune cells in the affected joint, to replicate an aggressive form of rheumatoid arthritis, where immune cell activity has been greatly amplified. As an example, we show results of the case where immune cell proliferation is increased one hundred-fold in Figure 7. Here, we observe a larger increase in the number of fibroblasts and macrophages over time as expected. We also see that the concentration of MMPs is increased in comparison to the previous cases. Furthermore, the cartilage degradation is more severe than the previous cases and we begin to see bone degradation occurring. Here, the standard deviation is much larger in the cell numbers. Interestingly though there is still very low standard deviation in the MMP concentration, and cartilage and bone densities. This suggests, from a modelling perspective, that even stochasticity in the number or spatial position of cells, we still expect similar levels of cartilage and bone degradation. We confirm this by plotting the final spatial distributions of each run of the simulation for the case shown in Figure 7, in Figure 8, where we observe a variety of spatial patterns arising from the cell dynamics, which do not appear to affect the overall outputs of the model.

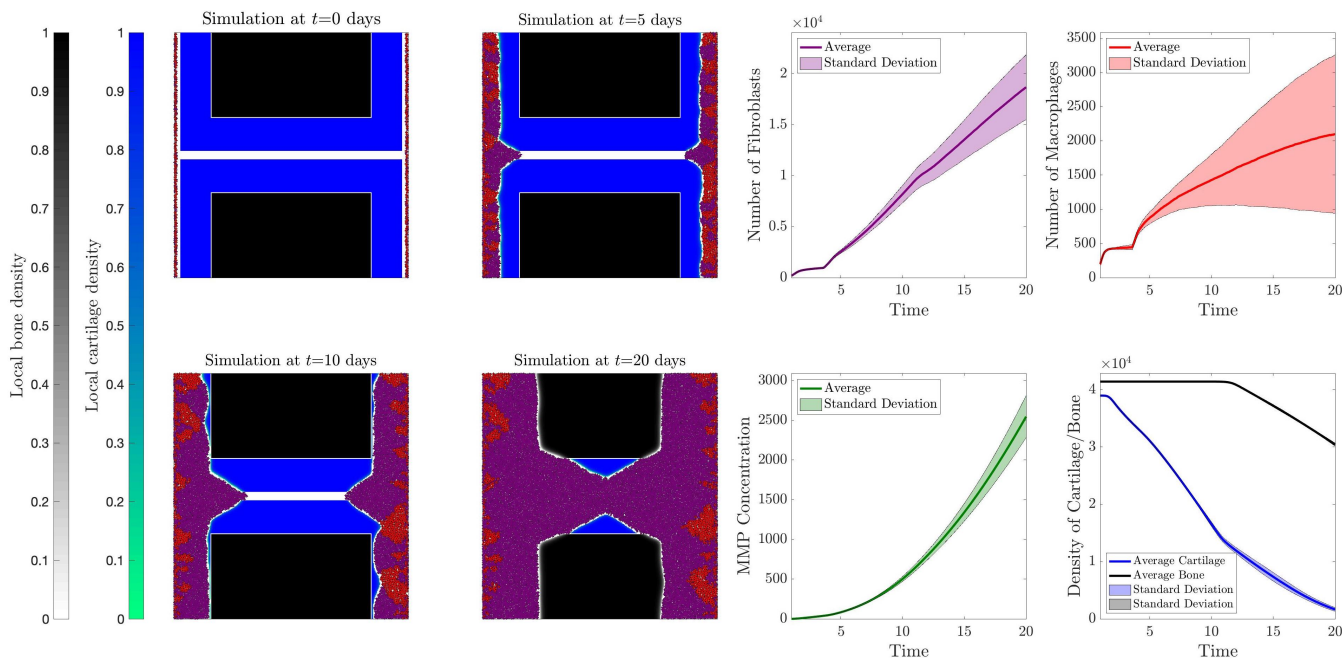

Figure 7: Example results where all parameters are those given in Table 2 except  $\alpha_F$  and  $\alpha_M$  which are one hundred times the given value. **Left-hand plots:** Panels show the visualisation of spatial results of one of the runs of the simulation at the time-points  $t=\{0,5,10,20\}$  days. The red dots are macrophages, the purple dots are fibroblasts, the blue-green surface is cartilage density and the black-grey surface is bone density. White space represents space in which cells can move freely in the joint, *e.g.*, synovial fluid. **Right-hand plots:** The plots show the cell number, concentration or density over time averaged over 5 simulation runs with the standard deviation shaded. The number of fibroblasts is given in purple, the number of macrophages in red, the global MMP concentration in green, the global cartilage density in blue and the global bone density in black.

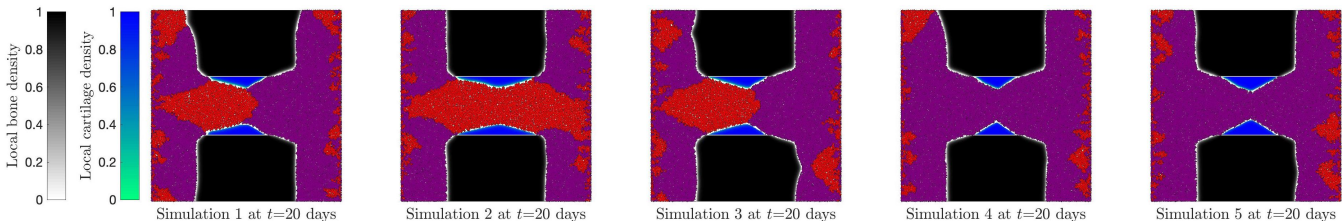

Figure 8: Panels show final visualisations of the 5 individual simulation runs to compare the spatial distributions of cells. The red dots are macrophages, the purple dots are fibroblasts, the blue-green surface is cartilage density and the black-grey surface is bone density. White space represents space in which cells can move freely in the joint, *e.g.*, synovial fluid. Here, all parameters are base case except  $\alpha_F$  and  $\alpha_M$  which are one hundred times the base value.

### 3.3 Single parameter sensitivity analysis

The initial parameter choices of our model are taken or estimated from a range of theoretical and experimental work, as described in C. However, this method of parameter estimation can lead to uncertainties. Therefore, it is useful to investigate how sensitive the outputs of the model are to changes in the parameter value inputs. Sensitivity analysis techniques can help identify the key parameters within the model and identify which parameters require more accurate values to ensure accuracy of the model output [36, 81]. We perform a local ‘robustness’ sensitivity analysis where one single input parameter is varied while all others are kept at fixed values. We keep all parameter values to be constant, choosing the values given in Table 2 and then testing scaled values of the parameter under investigation. For each sensitivity analysis we incorporate a vector  $S$  to represent scalar values to multiply the

parameter under investigation, where,

$$S = [0.001, 0.005, 0.01, 0.05, 0.1, 0.5, 1, 5, 10, 50, 100]. \quad (3.1)$$

We use the notation  $S_n = S(n)$  for  $n = 1, \dots, 11$  to denote the value of each component. The maximum value of  $S$  is chosen to ensure all probabilities are less than or equal to 1. We then investigate parameters by setting,

$$\Theta_n = S_n \Theta \quad \text{for } n = 1, \dots, 11,$$

where  $\Theta$  is the parameter investigated. The model outputs that we focus on are the total number of fibroblasts and macrophages over time, along with the global MMP concentration, global cartilage density and global bone density over time. Where global concentration/density refers to the sum of the concentrations/densities across all spatial positions in the domain. Each parameter setting is run 5 times and the average is plotted along with the standard deviation of these runs.

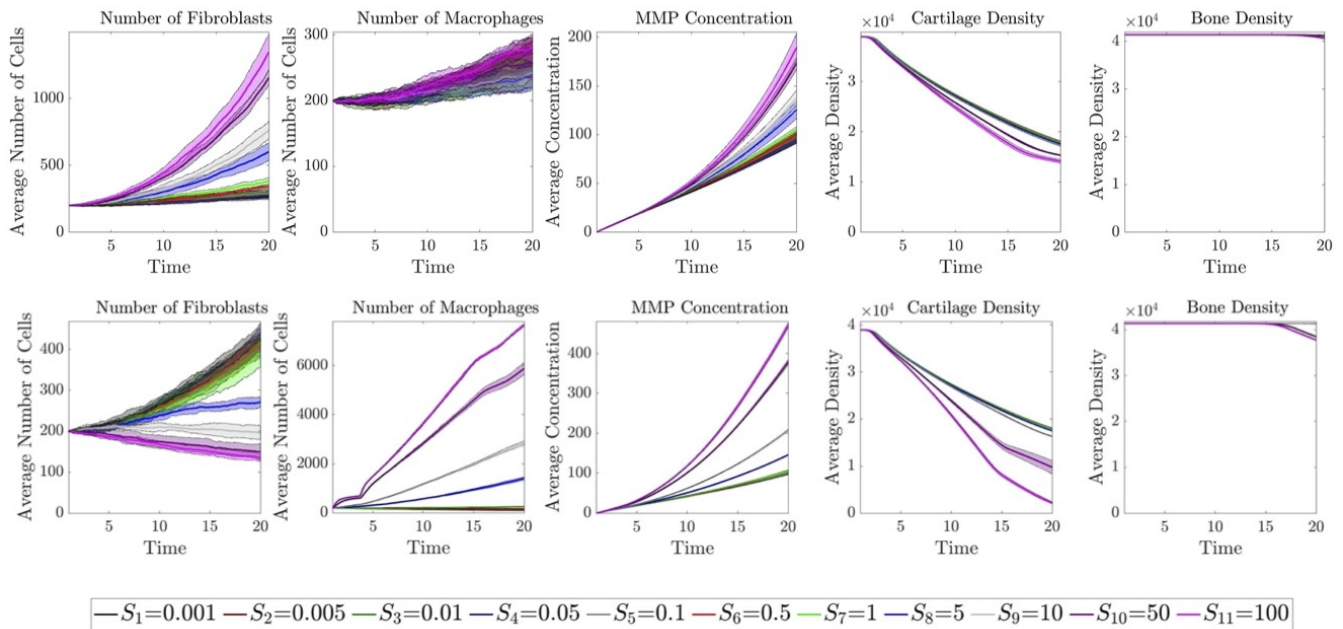

Figure 9: Sensitivity analyses of the movement probability of fibroblasts  $\lambda_F$ , (**top row**), or the movement probability of macrophages  $\lambda_M$ , (**bottom row**). The five columns represent the five key outputs of the model: the total number of fibroblasts over time, the total number of macrophages over time, the global MMP concentration over time, the global cartilage density over time and the global bone density over time. In each subplot the results for each scalar value of  $S_n$  is plotted as indicated by the legend, where the original values of  $\lambda_F$  or  $\lambda_M$  are multiplied by  $S_n$  in each case. The solid line is the average of five runs of the simulation and the shaded area in the same colour is the standard deviation between runs.

In Figure 9, we consider the movement probabilities of fibroblasts and macrophages,  $\lambda_F$  and  $\lambda_M$ . In the case where we vary  $\lambda_F$  only (top row), for  $S_n \leq S_7 = 1$  there is no significant difference in all 5 outputs. However, for other values (*i.e.*,  $S_n \geq S_8 = 5$ ) there is a gradual increase in the number of fibroblasts and global MMP concentrations as  $\lambda_F$  increases. For larger values of  $S_n \geq S_{10} = 50$  we additionally observe an increase in the degradation of cartilage, however for all  $S_n$  there is no significant difference in total macrophage number or bone degradation levels. In the case where we vary  $\lambda_M$  only (bottom row), for  $S_n \leq S_7 = 1$  there is no significant difference in all 5 outputs. For the values of  $S_n \geq S_8 = 5$  we observe an increase in the number of macrophages, an increase in global MMP concentration and a decrease in the number of fibroblasts in the system over time as we increase  $\lambda_M$ . Furthermore, for values  $S_n \geq S_{10} = 50$  we additionally observe an increase in both cartilage and bone degradation over time. In both cases, for varying  $\lambda_F$  or  $\lambda_M$ , the standard deviation between runs is relatively low. These results suggest that although varying the movement probability of fibroblasts or macrophages may alter the immune cell numbers, varying these parameters does not significantly alter the cartilage and bone degradation unless large values are chosen. As each cell can only move and proliferate into free space around them increasing their movement probability allows

them to find areas of free space quicker, which subsequently allows them to proliferate more freely resulting in higher numbers of cells permitted in the system, as observed.

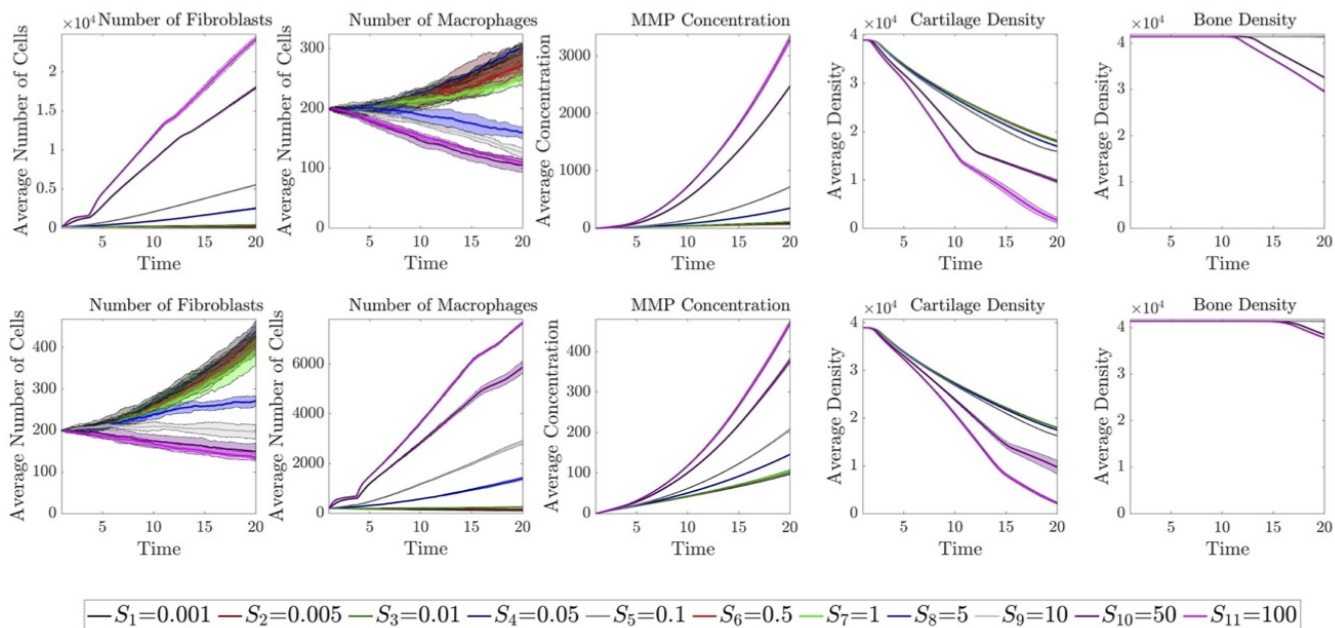

Figure 10: Sensitivity analyses of the division probability of fibroblasts  $\alpha_F$ , (**top row**), or the division probability of macrophages  $\alpha_M$ , (**bottom row**). The five columns represent the five key outputs of the model: the total number of fibroblasts over time, the total number of macrophages over time, the global MMP concentration over time, the global cartilage density over time and the global bone density over time. In each subplot the results for each scalar value of  $S_n$  is plotted as indicated by the legend, where the original values of  $\alpha_F$  or  $\alpha_M$  are multiplied by  $S_n$  in each case. The solid line is the average of five runs of the simulation and the shaded area in the same colour is the standard deviation between runs.

We next consider the probability of cell division for fibroblasts and macrophages,  $\alpha_F$  and  $\alpha_M$ , respectively, and each sensitivity analysis result is displayed in Figure 10. For the cases where we vary  $\alpha_F$  (top row), for the values  $S_n \leq S_7 = 1$  there is no significant difference in all 5 outputs. For the other values,  $S_n \geq S_8 = 5$ , we observe an increase in the total number of fibroblasts, an increase in the global MMP concentration and a decrease in the total number of macrophages as we increase  $\alpha_F$ . For the larger values of  $S_n \geq S_{10} = 50$ , we additionally observe a significant increase in the cartilage and bone degradation levels as we increase fibroblast cell division. Similarly, for the cases where we vary  $\alpha_M$  (bottom row), for the values  $S_n \leq S_7 = 1$  there is no significant difference in all 5 outputs. When  $S_n \geq S_8 = 5$  we observe a decrease in the number of fibroblasts, an increase in the total number of macrophages and an increase in MMP global concentration as we increase  $\alpha_M$ . For the larger values of  $S_n \geq S_{10} = 50$ , we additionally observe a significant increase in the cartilage and bone degradation levels as we increase fibroblast cell division. Once again, in both cases, for varying  $\alpha_F$  or  $\alpha_M$ , the standard deviation between runs is relatively low. The results of these sensitivity analyses highlight that the values of  $\alpha_F$  and, to a lesser extent,  $\alpha_M$  can significantly alter the output in terms of cartilage and bone degradation. The results also highlight the competition for space between the two cell populations, where an increase in the number of fibroblasts leads to a decrease in the number of macrophages, and vice versa, in some of the parameter settings shown.

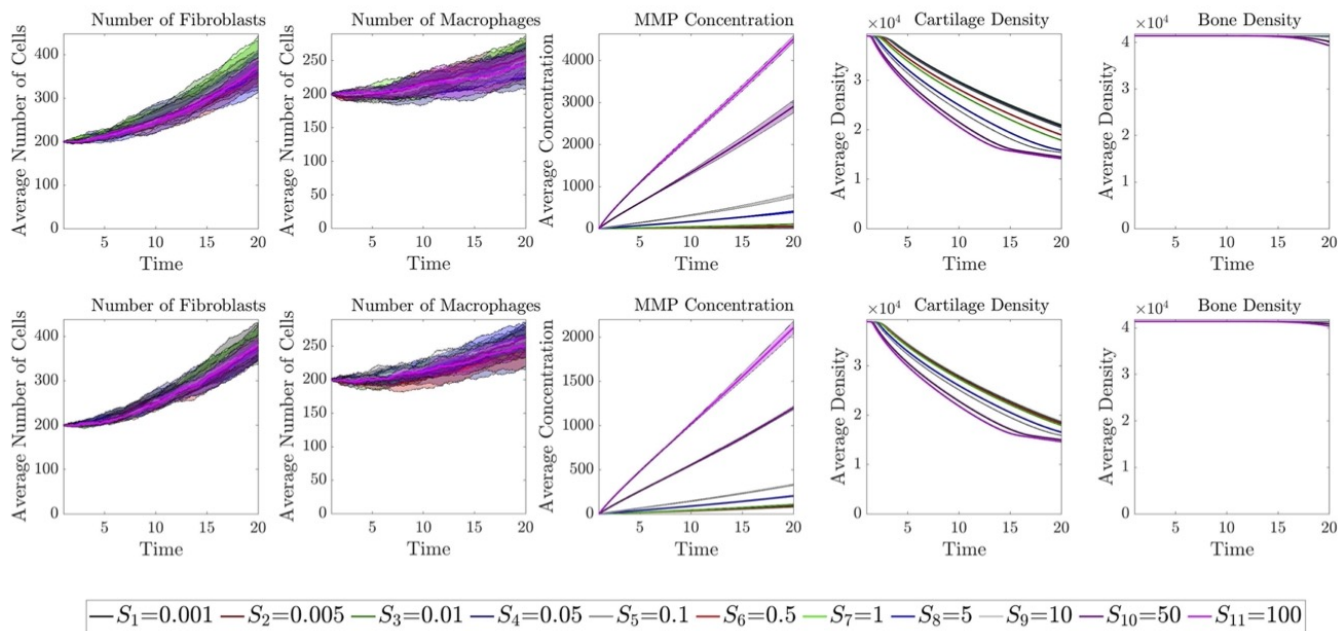

Figure 11: Sensitivity analyses of the MMP secretion rate of fibroblasts  $\beta_F$ , (**top row**), or the MMP secretion rate of macrophages  $\beta_M$ , (**bottom row**). The five columns represent the five key outputs of the model: the total number of fibroblasts over time, the total number of macrophages over time, the global MMP concentration over time, the global cartilage density over time and the global bone density over time. In each subplot the results for each scalar value of  $S_n$  is plotted as indicated by the legend, where the original values of  $\beta_F$  or  $\beta_M$  are multiplied by  $S_n$  in each case. The solid line is the average of five runs of the simulation and the shaded area in the same colour is the standard deviation between runs.

In Figure 11, we display the results of sensitivity analyses for varying the values of the MMP secretion rates of both fibroblasts and macrophages,  $\beta_F$  and  $\beta_M$ . For all values of  $S_n$  the total number of fibroblasts and macrophages is consistent, as expected, as both macrophage fibroblast movement and proliferation is unaffected by  $\beta_F$  and  $\beta_M$ . When varying  $\beta_F$  (top row), for the values of  $S_n \leq S_7 = 1$  there is no significant change in the global MMP concentration levels, however we observe an increase in these levels once  $S_n \geq S_8 = 5$ . Furthermore, as we increase  $\beta_F$ , for values  $S_n \geq S_5 = 0.1$ , there is an increase in the degradation of cartilage. There is no change in the bone degradation levels, until  $S_n \geq S_{10} = 50$  where there is a slight increase in bone degradation. In the case where we vary  $\beta_M$  only (bottom row), for  $S_n \geq 5$  we observe that the global MMP concentration increases as we increase the value of  $\beta_M$ , and the cartilage density decreases over time faster as we increase  $\beta_F$  for values  $S_n \geq S_5 = 0.1$ . There is additionally a small increase in bone degradation as we increase  $\beta_M$  for values of  $S_n \geq S_{10} = 50$ . Once again, in both cases, for varying  $\beta_F$  or  $\beta_M$ , the standard deviation between runs is relatively low. The results of these sensitivity analyses highlight that the values of  $\beta_F$  and  $\beta_M$  can significantly alter the output in terms of cartilage degradation, but not bone degradation significantly over the time-frame considered. The results also highlight that increasing the secretion rate of fibroblasts seems to have a larger effect on cartilage degradation than increasing the secretion rate of macrophages, this could be due to the larger size of macrophages and the modelling choice that MMPs are only secreted at the centre of the cell.



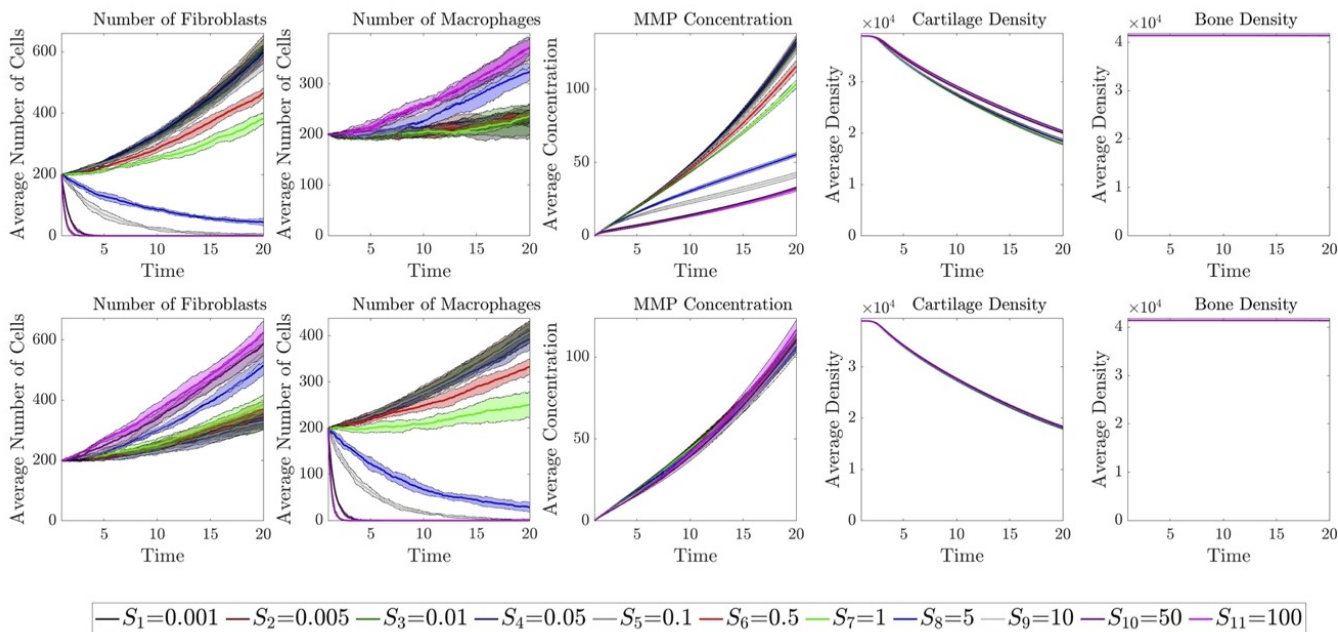

Figure 12: Sensitivity analyses of the apoptosis probability of fibroblasts  $\kappa_F$ , (**top row**), or the apoptosis probability of macrophages  $\kappa_M$ , (**bottom row**). The five columns represent the five key outputs of the model: the total number of fibroblasts over time, the total number of macrophages over time, the global MMP concentration over time, the global cartilage density over time and the global bone density over time. In each subplot the results for each scalar value of  $S_n$  is plotted as indicated by the legend, where the original values of  $\kappa_F$  or  $\kappa_M$  are multiplied by  $S_n$  in each case. The solid line is the average of five runs of the simulation and the shaded area in the same colour is the standard deviation between runs.

The sensitivity analysis results for varying the apoptosis probabilities of fibroblasts or macrophages,  $\kappa_F$  and  $\kappa_M$ , are displayed in Figure 12. For the case where we vary  $\kappa_F$  only (top row), for the values of  $S_n \leq S_5 = 0.1$  there is no difference in the 5 outputs and for all values of  $S_n$  there is no change in the bone density levels over the time investigated. For the values of  $S_n \geq S_6 = 0.5$  we observe a decrease in fibroblasts cell number and a decrease in MMP concentration levels as we increase  $\kappa_F$ . For the values of  $S_n \geq S_8 = 5$  there appears to be an increase in the total number of macrophages and a small decrease in cartilage degradation as we increase  $\kappa_F$ . When considering the sensitivity analysis for varying  $\kappa_M$  (bottom row), we observe that for all values of  $S_n$  there is no significant difference in the global MMP concentration, cartilage density or bone density outputs. For values of  $S_n \geq S_8 = 5$  there is an increase in the total number of fibroblasts as  $\kappa_F$  increases, while for values of  $S_n \geq S_6 = 0.5$  the total number of macrophages decreases as  $\kappa_F$  increases. The results of these sensitivity analyses on  $\kappa_F$  and  $\kappa_M$  suggests that the values of  $\kappa_F$  and  $\kappa_M$  will not significantly alter the output in terms of cartilage degradation or bone degradation. However, these parameters can play a role in MMP concentration and the total number of fibroblasts and macrophages. As we increase the probability of death of one cell type, this allows the other cell type to proliferate more freely due to the increased free space, as observed in the figures displayed. As with previous sensitivity analyses, the results are robust as we observe small standard deviation between runs for all cases.

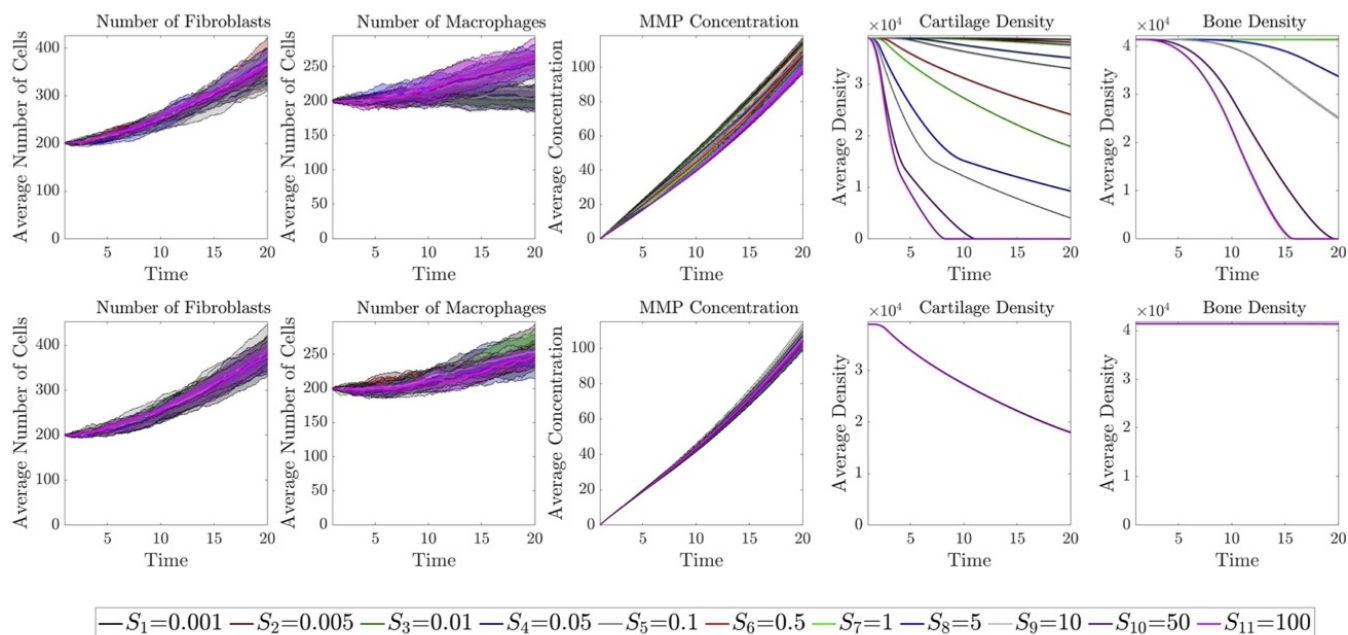

Figure 13: Sensitivity analyses of the diffusion rate of MMP  $\lambda_{CMMP}$ , (**top row**), or the MMP decay rate  $\kappa_{CMMP}$ , (**bottom row**). The five columns represent the five key outputs of the model: the total number of fibroblasts over time, the total number of macrophages over time, the global MMP concentration over time, the global cartilage density over time and the global bone density over time. In each subplot the results for each scalar value of  $S_n$  is plotted as indicated by the legend, where the original value of  $\lambda_{CMMP}$  is multiplied by  $S_n$  in each case. The solid line is the average of five runs of the simulation and the shaded area in the same colour is the standard deviation between runs.

Next we consider the diffusion rate of MMPs,  $\lambda_{CMMP}$ , and the decay rate of MMPs,  $\kappa_{CMMP}$ , and perform sensitivity analyses with the results displayed in Figure 13. When varying  $\lambda_{CMMP}$  (top row), for all values of  $S_n$ , there is very little difference in the total number of fibroblasts, macrophages and global MMP concentrations in the model outputs. For the values of  $S_n \geq S_4 = 0.05$  there is significant increase in the cartilage degradation levels as we increase  $\lambda_{CMMP}$ , while for values of  $S_n \geq S_8 = 5$  we additionally observe an increase in bone degradation as  $\lambda_{CMMP}$  increases. Considering the sensitivity analysis of the decay rate of MMPs,  $\kappa_{CMMP}$  (bottom row), we observe that for all values of  $S_n$  there is no significant change in the 5 model outputs. These results suggest that  $\kappa_{CMMP}$  not a key parameter in determining the model results, while varying  $\lambda_{CMMP}$  can significantly impact the output in terms of cartilage degradation or bone degradation. As we increase the diffusion rate of the MMPs, this allows the concentration in the cartilage and bone space significantly faster, promoting increased degradation. As with previous sensitivity analyses, the results are robust as we observe small standard deviation between runs for all case

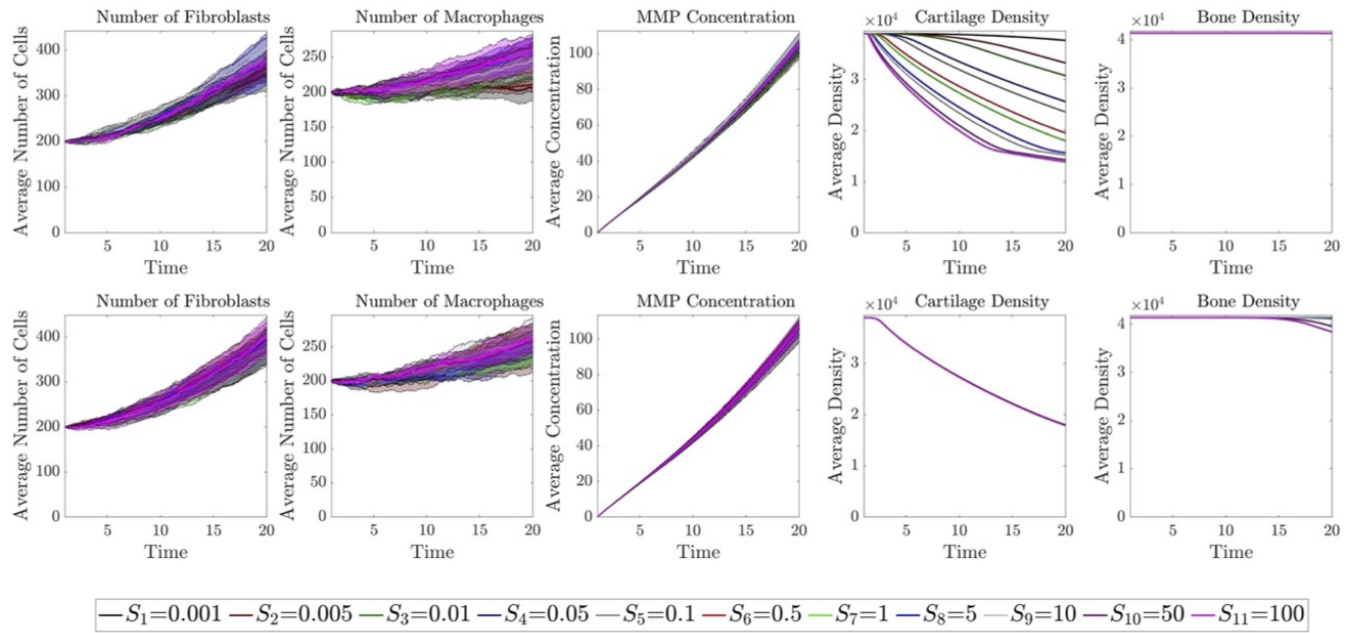

Figure 14: Sensitivity analyses of the MMP degradation rate of cartilage  $\kappa_{\rho_C}$ , (**top row**), or the MMP degradation rate of bone  $\kappa_{\rho_B}$ , (**bottom row**). The five columns represent the five key outputs of the model: the total number of fibroblasts over time, the total number of macrophages over time, the global MMP concentration over time, the global cartilage density over time and the global bone density over time. In each subplot the results for each scalar value of  $S_n$  is plotted as indicated by the legend, where the original values of  $\kappa_{\rho_C}$  or  $\kappa_{\rho_B}$  are multiplied by  $S_n$  in each case. The solid line is the average of five runs of the simulation and the shaded area in the same colour is the standard deviation between runs.

Finally, we perform sensitivity analyses on the degradation rates of cartilage and bone by MMPs,  $\kappa_{\rho_C}$  and  $\kappa_{\rho_B}$ , the results of which are displayed in Figure 14. From the results of the sensitivity analysis on  $\kappa_{\rho_C}$  (top row) we observe that for all values of  $S_n$  there are no significant differences in the total number of fibroblasts, the total number of macrophages, the MMP concentrations or bone density levels as the values of  $\kappa_{\rho_C}$  are varied. However, for all values of  $S_n$  we observe an increase in cartilage degradation as we increase  $\kappa_{\rho_C}$ . From the results of the sensitivity analysis on  $\kappa_{\rho_B}$  (bottom row) we observe that for all values of  $S_n$  there are no significant differences in the total number of fibroblasts, the total number of macrophages, the MMP concentrations or cartilage density levels as the values of  $\kappa_{\rho_B}$  are varied. However, for values of  $S_n \geq S_{10} = 50$  we observe a very slight increase in bone degradation as we increase  $\kappa_{\rho_B}$ . These results suggest that  $\kappa_{\rho_C}$  and  $\kappa_{\rho_B}$  only affect the output levels of cartilage and bone, respectively, and not the other outputs of the model. Furthermore, varying  $\kappa_{\rho_C}$  has a larger effect on affected outputs than  $\kappa_{\rho_B}$ , for the time-frame considered. As with previous sensitivity analyses, the results are robust as we observe small standard deviation between runs for all case

### 3.4 Relating our results to RA treatments

The modelling framework simulates a situation where no intervention (*e.g.* treatment) is included, however the results shown in Subsections 3.2 and 3.3 can be implicitly related to several therapies currently used to treat rheumatoid arthritis. Without adding drugs explicitly to the model, we can consider the effects of treatment by varying the parameters within the model according to the mechanism targeted by the drugs. Below we discuss briefly some of commonly used treatments for RA. An overview of the drugs we could consider and the mechanisms that they promote or inhibit are given in Figure 15.

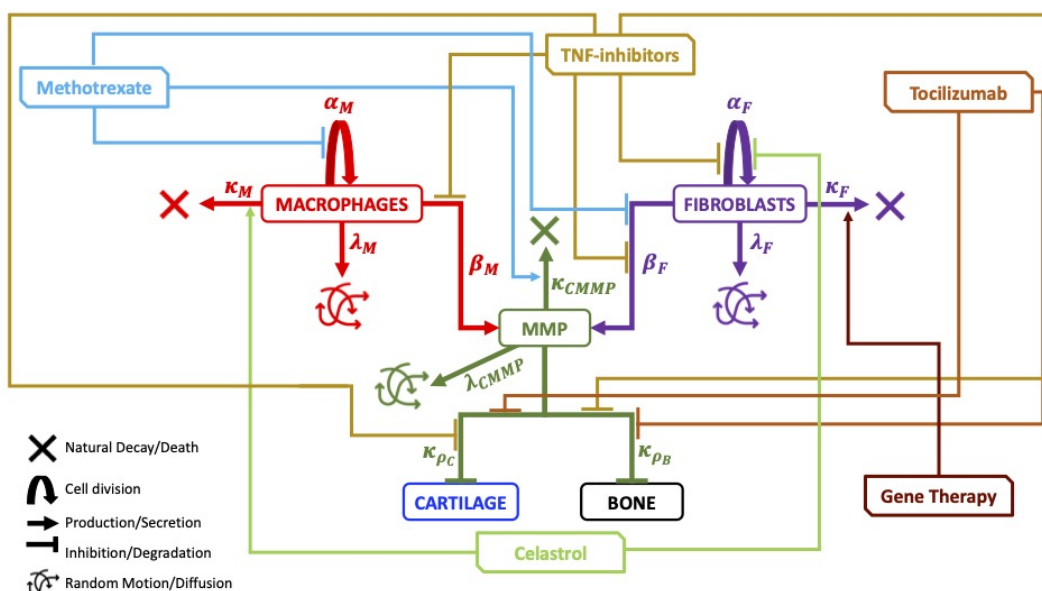

Figure 15: Schematic describing the mechanisms and parameters included in the hybrid model (Figure 4) with potential therapy affects included. TNF- $\alpha$  inhibitors (Gold) can inhibit fibroblast division, inhibit MMP secretion by both macrophages and fibroblasts and inhibit both cartilage and bone degradation in the RA setting. Tocilizumab (Dark orange) can inhibit both cartilage and bone degradation in the RA setting. Methotrexate (Pale Blue) can inhibit macrophage division, promote MMP decay and inhibit MMP secretion by fibroblasts in the RA setting. Gene therapy (Dark Red) can promote fibroblast apoptosis and celastrol (Pale green) can promote macrophage apoptosis and inhibit fibroblast division in the RA setting.

Disease modifying anti-rheumatic drugs (DMARDs) can target specific mechanisms within RA. For example, methotrexate, which is the most commonly prescribed drug in the UK [35, 56], has been shown to modify the cytokine profile of patients. More specifically, reducing IL-6 levels, which play a role in promoting macrophage division [23], inhibiting secretion of MMPs by fibroblasts [23, 35] and increasing the levels of TIMPs which inhibit MMPs [23]. Other drugs target specific cytokines within rheumatoid arthritis. Tumour necrosis factor- $\alpha$  (TNF- $\alpha$ ) plays a role in promoting the inflammatory mechanisms within RA. TNF- $\alpha$  inhibitors, such as infliximab, adalimumab and etanercept are commonly prescribed biological disease modifying anti-rheumatic drugs (DMARDs) that target TNF- $\alpha$ . In untreated RA, TNF- $\alpha$  can promote secretion of MMPs by both fibroblasts and macrophages [35], promote fibroblast cell division [35] and promote cartilage and bone degradation [28, 35]. Therefore TNF- $\alpha$  inhibitors, can reduce these effects within the RA environment. Tocilizumab is another biological DMARD which targets and inhibits the IL-6 receptor which is produced by several immune cell types. Among other things, IL-6 can promote cartilage and bone degradation [28, 35, 78]. By blocking IL-6 receptors, tocilizumab can reduce the effects of this cytokine. Less commonly used therapies such as chemotherapy through celastrol have promisingly been shown to reduce the aggressive proliferation of fibroblasts [27] and increase apoptosis in macrophages [25]. Gene therapies can also be used to target specific cell surface receptors [76], for example, genes can be delivered that induce apoptosis in RA fibroblasts, such as with the intra-articular delivery of vectors containing PUMA, a down-stream effector of p53 and an effective inducer of apoptosis [18, 40].

The drugs considered above can be implicitly considered within our mathematical modelling framework by increasing or decreasing the parameter(s) that controls the specified mechanism. We provide in Table 3 an overview of the mechanisms which each drug targets, the relevant parameter in the model and the corresponding sensitivity analysis results from Subsection 3.3 that correspond to increasing or decreasing that specific parameter without considering specific values for these parameters.

Where data is available, we can consider these drugs in more specific detail within the model. For example, in [27] it was found that when celastrol is added the fibroblast proliferation rate changed from approximately  $0.33 \text{ day}^{-1}$  to  $0.27 \text{ day}^{-1}$ . We can replicate this in our model by setting  $\alpha_F = 0.27 \Delta_{t_{cells}}$  rather than the original value of  $\alpha_F = 0.33 \Delta_{t_{cells}}$ , we show the results in Figure 16. From the figure we observe that this small reduction in  $\alpha_F$  does lead to less fibroblasts in the joint, and less MMPs secreted over time. However, this change is not enough to

modify the cartilage degradation levels over the time-frame considered. Therefore these results suggest that using celastrol alone, will be beneficial in reducing immune cell number, but not the overall disease outcomes and further treatments may be required to be used in conjunction with this.

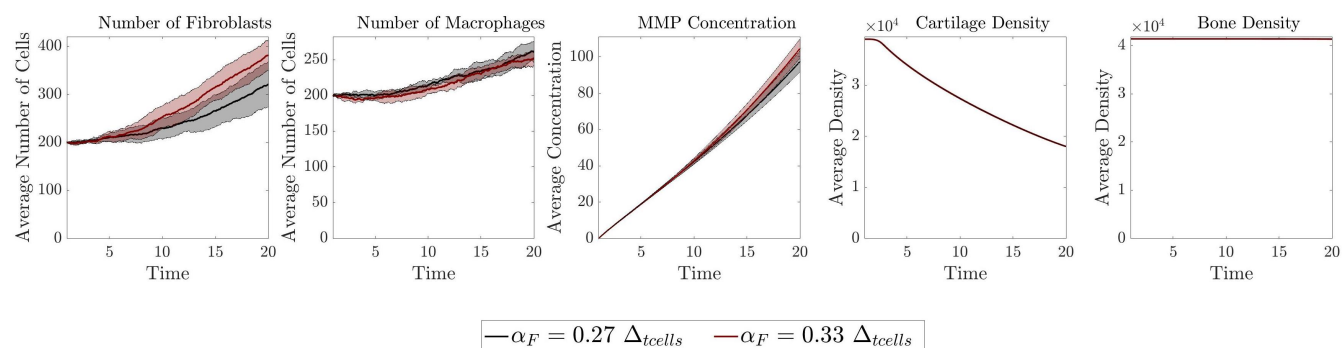

Figure 16: Comparing the key outputs of the model for  $\alpha_F = 0.27\Delta_{tcells}$  (black) to replicate a setting where the drug celastrol is used, compared to the original results for  $\alpha_F = 0.33\Delta_{tcells}$  (red). The five panels represent the five key outputs of the model: the total number of fibroblasts over time, the total number of macrophages over time, the global MMP concentration over time, the global cartilage density over time and the global bone density over time. The solid line is the average of five runs of the simulation and the shaded area in the same colour is the standard deviation between runs.

| Treatment                            | Relevant biological action(s) of drug                                                                                                                                                                                                                              | Incorporation into model                                                                                                                                                                    | Related model results                                                                                                                                                                                                                                                                                         |
|--------------------------------------|--------------------------------------------------------------------------------------------------------------------------------------------------------------------------------------------------------------------------------------------------------------------|---------------------------------------------------------------------------------------------------------------------------------------------------------------------------------------------|---------------------------------------------------------------------------------------------------------------------------------------------------------------------------------------------------------------------------------------------------------------------------------------------------------------|
| Celestrol                            | <ul style="list-style-type: none"> <li>• Decrease of fibroblast cell division [27]</li> <li>• Increase of macrophage cell death [25]</li> </ul>                                                                                                                    | <ul style="list-style-type: none"> <li>• Decrease <math>\alpha_F</math></li> <li>• Increase <math>\kappa_M</math></li> </ul>                                                                | <ul style="list-style-type: none"> <li>• Fig. 10 (<b>Top</b>): <math>S_n &lt; S_7</math> (<math>S_n &lt; 1</math>)</li> <li>• Fig. 12 (<b>Bottom</b>): <math>S_n &gt; S_7</math> (<math>S_n &gt; 1</math>)</li> </ul>                                                                                         |
| Gene therapies                       | Intra-articular delivery of vectors containing PUMA, an effective inducer of apoptosis of fibroblasts [18, 40]                                                                                                                                                     | Increase $\kappa_F$                                                                                                                                                                         | Fig. 12 ( <b>Top</b> ): $S_n > S_7$ ( $S_n > 1$ )                                                                                                                                                                                                                                                             |
| Methotrexate                         | <ul style="list-style-type: none"> <li>• Decrease of IL-6 promoted macrophage cell division [23]</li> <li>• Cytokine modulation decreases fibroblast MMP secretion [23, 35]</li> <li>• Cytokine modulation increases MMP inhibitor production [23]</li> </ul>      | <ul style="list-style-type: none"> <li>• Decrease <math>\alpha_M</math></li> <li>• Decrease <math>\beta_F</math></li> <li>• Increase <math>\kappa_{CMMF}</math></li> </ul>                  | <ul style="list-style-type: none"> <li>• Fig. 10 (<b>Bottom</b>): <math>S_n &lt; S_7</math> (<math>S_n &lt; 1</math>)</li> <li>• Fig. 11 (<b>Top</b>): <math>S_n &lt; S_7</math> (<math>S_n &lt; 1</math>)</li> <li>• Fig. 13 (<b>Bottom</b>): <math>S_n &gt; S_7</math> (<math>S_n &gt; 1</math>)</li> </ul> |
| TNF- $\alpha$ inhibitor (Adalimumab) | <ul style="list-style-type: none"> <li>• Decrease of TNF-<math>\alpha</math> promoted fibroblast secretion of MMPs [35]</li> <li>• Decrease of TNF-<math>\alpha</math> promoted macrophage secretion of MMPs [35]</li> </ul>                                       | <ul style="list-style-type: none"> <li>• Decrease <math>\beta_F</math></li> <li>• Decrease <math>\beta_M</math></li> </ul>                                                                  | <ul style="list-style-type: none"> <li>• Fig. 11 (<b>Top</b>): <math>S_n &lt; S_7</math> (<math>S_n &lt; 1</math>)</li> <li>• Fig. 11 (<b>Bottom</b>): <math>S_n &lt; S_7</math> (<math>S_n &lt; 1</math>)</li> </ul>                                                                                         |
| (Etanercept)                         | • Decrease of TNF- $\alpha$ promoted fibroblast cell division [35]                                                                                                                                                                                                 | • Decrease $\alpha_F$                                                                                                                                                                       | • Fig. 10 ( <b>Top</b> ): $S_n < S_7$ ( $S_n < 1$ )                                                                                                                                                                                                                                                           |
| (Infliximab)                         | • Decrease of TNF- $\alpha$ promoted cartilage degradation [28, 35]                                                                                                                                                                                                | • Decrease $\kappa_{\rho C}$                                                                                                                                                                | • Fig. 14 ( <b>Top</b> ): $S_n < S_7$ ( $S_n < 1$ )                                                                                                                                                                                                                                                           |
| IL-6 inhibitors (Tocilizumab)        | <ul style="list-style-type: none"> <li>• Reduction of TNF-<math>\alpha</math> promoted bone degradation [28, 35]</li> <li>• Decrease of IL-6 promoted cartilage degradation [35, 78]</li> <li>• Decrease of IL-6 promoted bone degradation [28, 35, 78]</li> </ul> | <ul style="list-style-type: none"> <li>• Decrease <math>\kappa_{\rho B}</math></li> <li>• Decrease <math>\kappa_{\rho C}</math></li> <li>• Decrease <math>\kappa_{\rho B}</math></li> </ul> | <ul style="list-style-type: none"> <li>• Fig. 14 (<b>Bottom</b>): <math>S_n &lt; S_7</math> (<math>S_n &lt; 1</math>)</li> <li>• Fig. 14 (<b>Top</b>): <math>S_n &lt; S_7</math> (<math>S_n &lt; 1</math>)</li> <li>• Fig. 14 (<b>Bottom</b>): <math>S_n &lt; S_7</math> (<math>S_n &lt; 1</math>)</li> </ul> |

Table 3: Treatments and drugs currently used to treat rheumatoid arthritis. We include the biological actions of each treatment that are relevant to the mechanisms considered within our mathematical model. We can implicitly include these mechanisms in the existing model by increasing or decreasing the relevant parameters. We provide the details of the results from Section 3.3 as an example of the effects that including these drugs implicitly could have on the model output.

### 3.4.1 Sensitivity analysis of combined characteristics

As detailed above, treatments for rheumatoid arthritis can target several mechanisms underlying the disease, rather than just a single mechanism. Therefore, it is beneficial to understand how affecting more than one mechanism within the modelling framework would affect the model output. We consider two combined sensitivity analyses focusing on the mechanisms of action of celestrol and tocilizumab.

We first consider the effects of the drug celestrol. As described above celestrol decreases the division rate of fibroblasts [27] and increases apoptosis of macrophages [25]. In our model this relates to decreasing the probability of fibroblast division  $\alpha_F$  and increasing the probability of macrophage cell death  $\kappa_M$ . We perform a combined sensitivity analysis where we investigate the key outputs of the model when varying both these parameters, the results are displayed in Figure 17. The five panels represent the five key outputs of the model at the final time-step ( $t = 20$ ): the total number of fibroblasts, the total number of macrophages, the global MMP concentration, the global cartilage density and the global bone density. In each panel the value of each output for each parameter setting is displayed as a surface plot, where low values are shown in blue increasing towards high values in yellow. Each square within the panels represents a different parameter setting. We investigate 14 values for  $S_{\alpha_F} < 1$ , where in the model  $\alpha_F = S_{\alpha_F} \bar{\alpha}_F$  where  $\bar{\alpha}_F$  is the original value of  $\alpha_F$  given in Table 2. The values chosen are displayed below the figure as  $S_{\alpha_F}(\cdot) = L(\cdot)$ . Similarly, we investigate 17 values for  $S_{\kappa_M} > 1$ , where in the model  $\kappa_M = S_{\kappa_M} \bar{\kappa}_M$  where  $\bar{\kappa}_M$  is the original value of  $\kappa_M$  given in Table 2. The values chosen are displayed below the figure as  $S_{\kappa_M}(\cdot) = M(\cdot)$ . We run 5 simulations for each value of  $S_{\alpha_F}$  and  $S_{\kappa_M}$  and average the results to understand how altering both value will alter the model outputs. The results of the figure highlight that there is no correlation between the average number of fibroblasts and the value of  $\kappa_M$ , and as expected there is correlation between value of  $\alpha_F$  and the number of fibroblasts where we expect the population to have a net increase from the original value of  $N_F(0) = 200$  for values of  $S_{\alpha_F} > 0.25$ . That is, for values of  $S_{\alpha_F} < 0.25$  we observe that the population of fibroblasts will be maintained at or below the initial populations size. Similarly, there is no correlation between the average number of macrophages and the value of  $\alpha_F$ , and as expected there is correlation between value of  $\kappa_M$  and the number of macrophages where we expect the population to increase from the original value of  $N_M(0) = 200$  for values of  $S_{\kappa_M} \leq 3$ . For larger values of  $\kappa_M$  we observe extinction of the macrophage population. There is correlation of the global MMP concentration for both parameters where we expect lower concentrations of MMPs for higher values of  $\kappa_M$  and lower values of  $\alpha_F$ , with the larger values of  $\alpha_F$  having slightly more control over MMP levels. For both cartilage and bone densities we see similar correlations with the two parameters where yellow represents higher densities (less destruction) and blue represents lower densities (more destruction). Here, we observe that for lower values of  $\kappa_M$  ( $S_{\kappa_M} \leq 30$ ), that is when apoptosis of macrophages is lower, the effects of fibroblasts proliferation  $\alpha_F$  have less effect on the destruction of both bone and cartilage as there appears to be similar levels of destruction for all values of  $S_{\alpha_F}$ . When  $S_{\kappa_M} \geq 30$  we see less destruction of both cartilage and bone, except for high values of  $S_{\alpha_F}$ . These results allow us to find the regions of parameter space that we expect the drug celestrol to control and where in those parameter spaces we would expect a better outcome (less destruction of cartilage and bone).

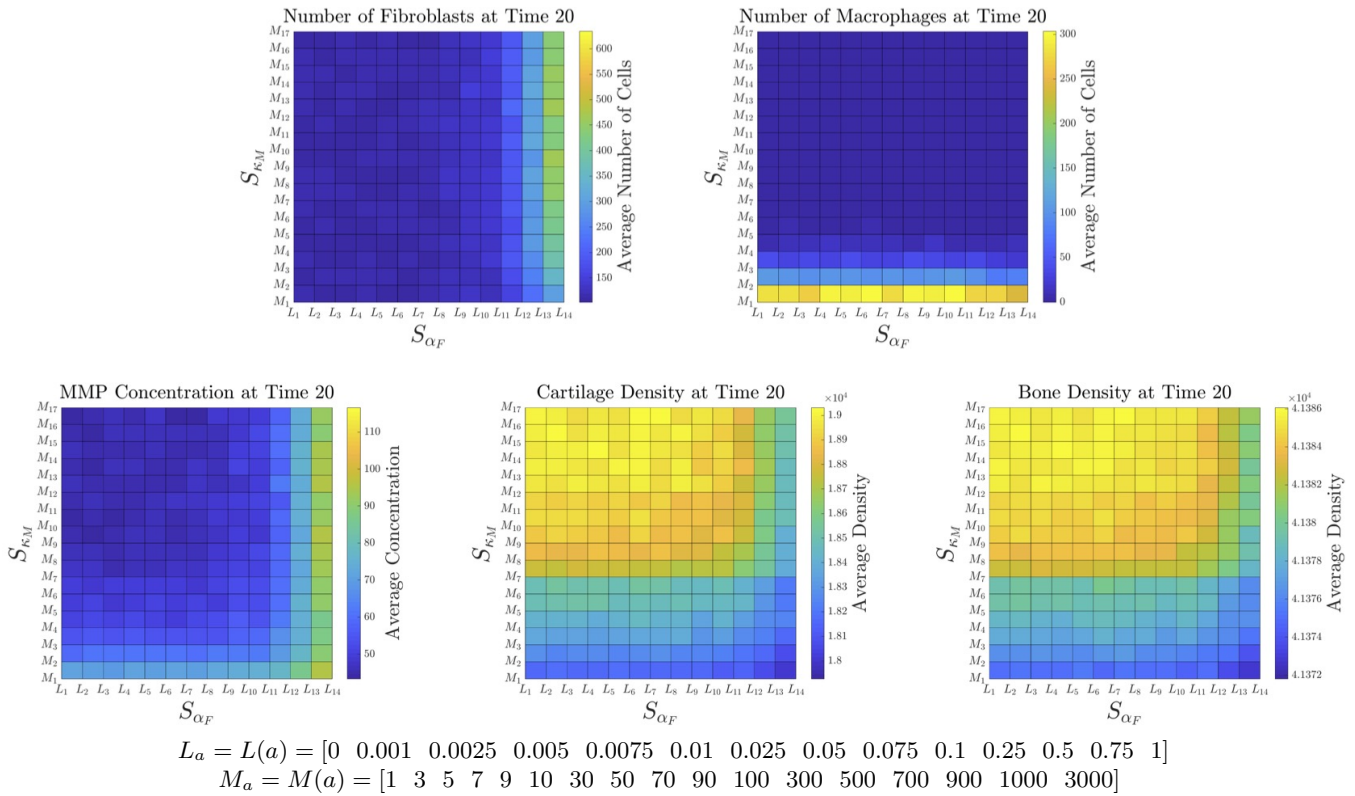

Figure 17: Combined sensitivity analysis of decreasing the division probability of fibroblasts ( $\alpha_F$ ) and increasing the apoptosis probability of macrophages ( $\kappa_M$ ). The five panels represent the five key outputs of the model at the final time-step: the total number of fibroblasts, the total number of macrophages, the global MMP concentration, the global cartilage density and the global bone density. In each panel the averaged results for each scalar value of  $S_{\alpha_F}$  and  $S_{\kappa_M}$  are displayed as a surface plot, where the original values of  $\alpha_F$  or  $\kappa_M$  are multiplied by  $S_{\alpha_F}$  and  $S_{\kappa_M}$ , respectively, in each case. The values investigated are given, where values of  $S_{\alpha_F}$  are taken from the vector  $L$ , and values of  $S_{\kappa_M}$  are taken from the vector  $M$ . The results shown are the average of five runs of the simulation.

We next consider the effects of the drug tocilizumab. As described above, tocilizumab blocks IL-6 promoted cartilage and bone degradation [28, 35, 78]. In our model this relates to decreasing both the decay rate of cartilage by MMPs  $\kappa_{\rho_C}$  and the decay rate of bone by MMPs  $\kappa_{\rho_B}$ . We perform a combined sensitivity analysis where we investigate the key outputs of the model when varying both these parameters, the results are displayed in Figure 18. The five panels represent the five key outputs of the model at the final time-step ( $t = 20$ ): the total number of fibroblasts, the total number of macrophages, the global MMP concentration, the global cartilage density and the global bone density. In each panel the value of each output for each parameter setting is displayed as a surface plot, where low values are shown in blue increasing towards high values in yellow. Each square within the panels represents a different parameter setting. We investigate here, 8 values for both  $S_{\kappa_{\rho_C}} < 1$  and  $S_{\kappa_{\rho_B}} < 1$ , that is decreasing values for both parameters. The simulations are run such that  $\kappa_{\rho_C} = S_{\kappa_{\rho_C}} \kappa_{\rho_C}^-$  and  $\kappa_{\rho_B} = S_{\kappa_{\rho_B}} \kappa_{\rho_B}^-$  where  $\kappa_{\rho_C}^-$  and  $\kappa_{\rho_B}^-$  are the original decay rates given in Table 2. The values investigated are displayed below the figure as  $S_{\kappa_{\rho_C}}(\cdot) = L(\cdot)$  and  $S_{\kappa_{\rho_B}}(\cdot) = L(\cdot)$ . The results of the figure highlight that there is no significant change in the average number of fibroblasts, the average number of macrophages or the average MMP concentration when altering the decay rates of cartilage and bone. The small differences in these panels can be related to the stochasticity within the system. As shown in the panel of cartilage density, we observe clear correlation between the decay rate of cartilage by MMPs and the remaining cartilage at time  $t = 20$  while as expected, there is no correlation between cartilage destruction and the decay rate of bone by MMPs (which we would only expect to affect bone density). Inversely, when considering the bone density we observe clear correlation between the decay rate of bone by MMPs and the remaining cartilage at time  $t = 20$ . However, the decay rate of cartilage by MMPs does not seem to have any effect on bone density. These results allow us to find the regions of parameter space that we expect the drug tocilizumab to control and where in those parameter spaces we would expect a better outcome (less destruction of cartilage and bone).



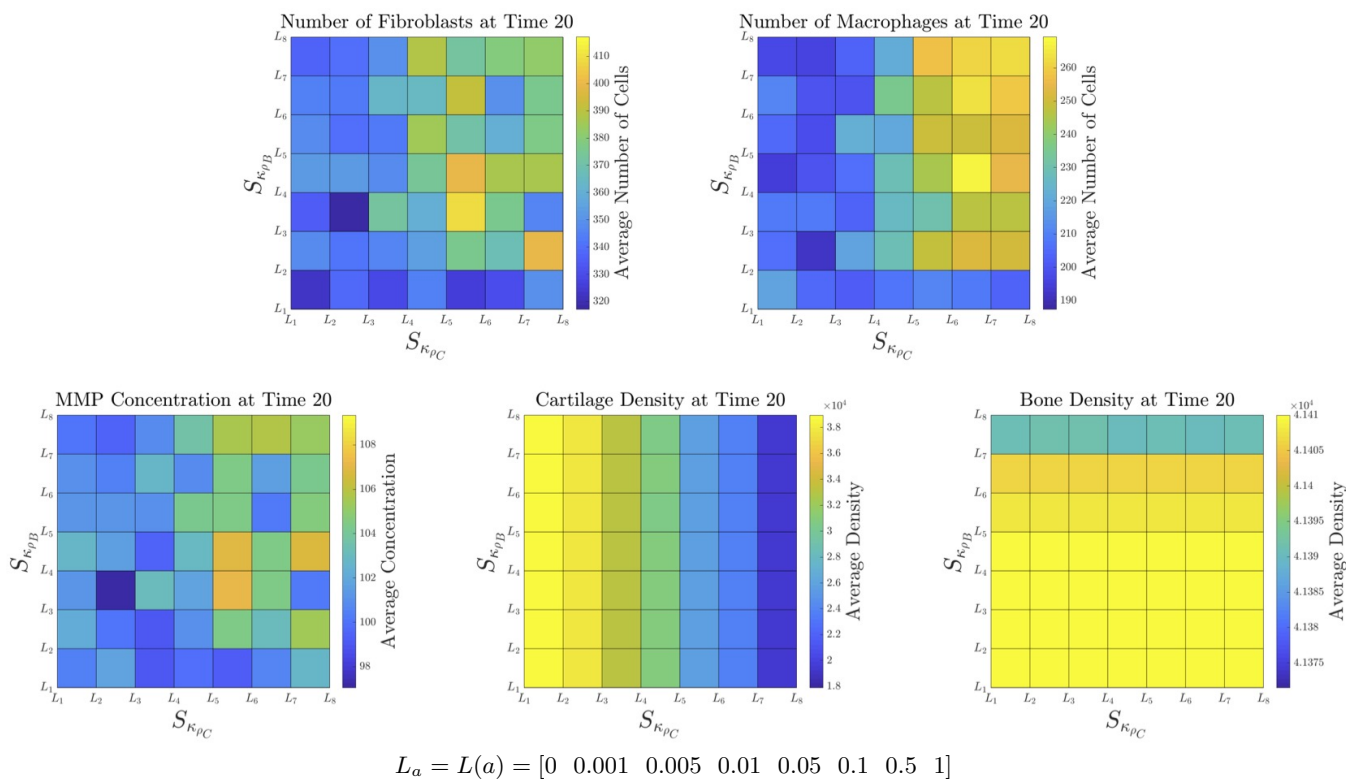

Figure 18: Combined sensitivity analysis of decreasing the decay rate of cartilage by MMPs ( $\kappa_{\rho_C}$ ) and decreasing the decay rate of bone by MMPs ( $\kappa_{\rho_B}$ ). The five panels represent the five key outputs of the model at the final time-step: the total number of fibroblasts, the total number of macrophages, the global MMP concentration, the global cartilage density and the global bone density. In each panel the averaged results for each scalar value of  $S_{\kappa_{\rho_C}}$  and  $S_{\kappa_{\rho_B}}$  are displayed as a surface plot, where the original values of  $\kappa_{\rho_C}$  or  $\kappa_{\rho_B}$  are multiplied by  $S_{\kappa_{\rho_C}}$  and  $S_{\kappa_{\rho_B}}$ , respectively, in each case. The values investigated are given, where values of  $S_{\kappa_{\rho_C}}$  and  $S_{\kappa_{\rho_B}}$  are both taken from the vector  $L$ . The results shown are the average of five runs of the simulation.

## 4 Discussion and conclusions

As a first step towards building a more realistic model of arthritic destruction within a small PIP joint, in this study we introduced an off-lattice hybrid model to describe the growth and development of the pannus in the context of rheumatoid arthritis (RA) within the PIP joint. The model combined an off-lattice individual-based approach for cell dynamics with a continuum PDE approach for MMPs, cartilage and bone dynamics. As mentioned this model is an initial formulation and a first step towards building a more realistic model of pannus formation within a rheumatoid arthritis affected joint. Therefore at this stage the model cannot be used to predict progression of disease accurately. However, the model can be used to understand the effects that altering the mechanisms included on the simulation results, highlighting the key parameters that require further validation.

We first provided some initial results that considered three scenarios with increasing proliferation rates of cells to highlight different contexts of rheumatoid arthritis (Figures 5-7). These results further highlighted from a modelling perspective that even when we observed spatial heterogeneity between simulation results (Figure 8), we still obtain low standard deviation in the global MMP concentrations, global cartilage density and global bone density outputs. This result highlighted that observing varied spatial patterns in the simulated pannus, can still result in the same outcomes and rate of degradation in the joint. This initial model is not yet at a stage where direct comparisons to clinical and experimental data can be made. However, once extended to contain appropriate levels of complexity and validated with more accurate data the model could be used to investigate the patterns of cell populations within joints affected by RA, such as those seen within studies that image the progression of RA [1, 2, 4, 14, 96].

To identify the role of the key parameters within the model and their affects on the outputs of the model, we performed a one-at-a-time sensitivity analysis. The results highlighted that varying the immune cell movement probabilities (Figure 9), varying the apoptosis rates of cells (Figure 12), varying the decay rate of MMPs (Figure 13) or varying the degradation rate of bone by MMPs (Figure 14) did not significantly affect cartilage and bone degradation

over the time-frame considered. On the other hand, the results showed that bone and cartilage density can be significantly reduced when we increase the division probability of cells (Figure 10), the MMP secretion rates of cell (Figure 11), the diffusion rate of MMPs (Figure 13) or the degradation rates of cartilage (Figure 14). Overall, these sensitivity results identify the parameters that cause the greatest variations in cartilage or bone density degradation levels. Further experimental and clinical studies will have to be performed to estimate better these parameter values. The sensitivity analysis results presented help us to identify which parameters require more accurate values for a biologically relevant parameterisation of the model (*i.e.* the parameters that the model outputs are most sensitive too).

In Section 3.4, we discussed the above sensitivity analysis results in the context of current therapeutic approaches for RA. In particular, we emphasised the model parameters that could be varied to investigate (implicitly) the effects of different drug therapies, and how these changes in model parameters were captured by our numerical simulation from the sensitivity analysis. Furthermore, focusing on the mechanisms targeted by celestrol and tocilizumab, we briefly investigate combined sensitivity analyses to investigate the affects of altering more than one parameter on model output(s). We note that the specific inclusion of the dynamics of these drugs into the mathematical model, which was not the purpose of this particular study, could lead to more complex dynamics due to potential nonlinear effects between different system components. This will be the focus of a future study.

## 4.1 Future work

As described in Section 1.1, there are various layers of biological complexity that have not been included in the model so far. This simple framework can be easily extended using the current methods to incorporate further biological complexity. We provide some suggested extensions to the model here.

The current model considers only resident cells within the joint space, however immune cells can also be recruited from the circulatory system and promote angiogenesis promoting this recruitment [17, 29, 35]. We can extend the model to allow new immune cells to enter the domain at the boundaries, or more specifically introduce vasculature at the boundaries of the domain and allow the cells to enter through blood vessels. Moreover, in RA, the growth of the pannus can result in local hypoxia driving angiogenesis which can further promote an influx of pro-inflammatory immune cells entering the joint [29]. If we include vasculature we can also consider the influx of oxygen and nutrients into the system, modelling these chemicals in as similar way to the MMPs in this work. The recruitment of cells through vasculature could be incorporated using methods similar to individual-based approaches used to model the metastasis of tumour cells through vasculature [30].

Currently we focus on homogeneous populations of immune cells, where all cells within the population exhibit the same probabilities of migration and proliferation. However, the phenotype of fibroblasts can be altered to a more tumour-like state where cell division is increases, apoptosis is decreased and migration is more invasive [11, 14, 21, 68]. There can be similar heterogeneity within the macrophage populations [97]. We can incorporate this within the model by tracking the phenotype of each fibroblast and macrophage and allow the cells to alter their phenotypes over time.

In the model we consider only resident fibroblasts and resident macrophages, and not subsets of these populations or other immune cell types. Further immune cells can play a role in the progression of rheumatoid arthritis such as T cells and B cells [17, 64]. These immune cells, their mechanisms and their interactions with components of the joint could be included within the model using the same methods as those used to incorporate fibroblasts and macrophages.

As mentioned in Section 2.3, we implicitly take into account the effects of tissue inhibitors of MMPs (TIMPs) by including decay of MMPs and limitations on the local concentration of MMPs. We could take explicitly include TIMPs, using PDEs and further investigating the activator-inhibitor like mechanisms of MMPs with TIMPs. To do this we could utilise a system of equations similar to that used in [66] to model MMP and TIMP dynamics.

Cartilage and bone densities are considered at a tissue-level scale within the framework. However we could explicitly incorporate the cellular-level components of these tissues. For example, the role of chondrocytes and the highly organised extracellular matrix (ECM) within cartilage [17, 19, 28, 35] could be considered. Furthermore, the (im)balance between osteoclasts, which degrade bone, and osteoblasts, which produce bone, within the bone [17, 28, 35] could also be investigated in the RA context further. To incorporate these features we could consider method similar to those used to previously model cartilage growth [93] or bone remodelling [3, 16, 32, 43, 49, 55].

All of the above mechanisms that can be incorporated into the model would extend the complexity of the model and the number of parameters required. Therefore, to incorporate this biological complexity and to obtain biological relevance, we would require recent clinical and experimental data to validate the modelling choices and parameter

settings investigated.

## Acknowledgments

## Conflict of interest

All authors declare no conflicts of interest in this paper.

## References

- [1] N Adán, J Guzmán-Morales, M G Ledesma-Colunga, S I Perales-Canales, A Quintanar-Stéphano, F López-Barrera, I Méndez, B Moreno-Carranza, J Triebel, N Binart, et al. Prolactin promotes cartilage survival and attenuates inflammation in inflammatory arthritis. *J. Clin. Invest.*, 123(9):3902–3913, 2013.
- [2] A Anandarajah, R Thiele, E Giampoli, J Monu, G Seo, C Feng, and C T Ritchlin. Patients with rheumatoid arthritis in clinical remission manifest persistent joint inflammation on histology and imaging studies. *J. Rheumatol.*, 41(11):2153–2160, 2014.
- [3] A Araujo, L M Cook, C C Lynch, and D Basanta. An integrated computational model of the bone microenvironment in bone-metastatic prostate cancer. *Cancer Res.*, 74(9):2391–2401, 2014.
- [4] S M Atkinson, R Bleil, Jand Maier, A A Köhl, M Thorn, K Serikawa, B Fox, K Kruse, C Haase, S Skov, et al. Anti-RANKL treatment inhibits erosive joint destruction and lowers inflammation but has no effect on bone formation in the delayed-type hypersensitivity arthritis (DTHA) model. *Arthritis Res. Ther.*, 18(1):1–12, 2016.
- [5] A M Bailey, B C Thorne, and S M Peirce. Multi-cell agent-based simulation of the microvasculature to study the dynamics of circulating inflammatory cell trafficking. *Ann. Biomed. Eng.*, 35(6):916–936, 2007.
- [6] M Baker, S Denman-Johnson, B S Brook, I Gaywood, and M R Owen. Mathematical modelling of cytokine-mediated inflammation in rheumatoid arthritis. *Math. Med. Biol.*, 30(4):311–337, 2013.
- [7] V Baldazzi, F Castiglione, and M Bernaschi. An enhanced agent based model of the immune system response. *Cell. Immunol.*, 244(2):77–79, 2006.
- [8] B Bartok and G S Firestein. Fibroblast-like synoviocytes: Key effector cells in rheumatoid arthritis. *Immunol. Rev.*, 233(1):233–255, 2010.
- [9] A Bayani, J L Dunster, J J Crofts, and M R Nelson. Spatial considerations in the resolution of inflammation: Elucidating leukocyte interactions via an experimentally-calibrated agent-based model. *PLoS Comp. Biol.*, 16(11):e1008413, 2020.
- [10] E N Bodine, R M Panoff, E O Voit, and A E Weisstein. Agent-based modeling and simulation in mathematics and biology education. *Bull. Math. Biol.*, 82(8):1–19, 2020.
- [11] N Bottini and G S Firestein. Duality of fibroblast-like synoviocytes in RA: passive responders and imprinted aggressors. *Nat. Rev. Rheumat.*, 9(1):24–33, 2013.
- [12] F Bubba, T Lorenzi, and F R Macfarlane. From a discrete model of chemotaxis with volume-filling to a generalized Patlak–Keller–Segel model. *Proc. R. Soc. A*, 476(2237):20190871, 2020.
- [13] C D Buckley, C Ospely, S Gay, and K S Midwood. Location, location, location: How the tissue microenvironment affects inflammation in RA. *Nat. Rev. Rheum.*, 17(4):195–212, 2021.
- [14] M F Bustamante, R Garcia-Carbonell, K D Whisnant, and M Guma. Fibroblast-like synoviocyte metabolism in the pathogenesis of rheumatoid arthritis.
- [15] E Calabresi, F Petrelli, A F Bonifacio, I Puxeddu, and A Alunno. One year in review 2018: Pathogenesis of rheumatoid arthritis. *Clin. Exp. Rheumatol.*, 36(2):175–184, 2018.

- [16] A Carlier, L Geris, N van Gastel, G Carmeliet, and H Van Oosterwyck. Oxygen as a critical determinant of bone fracture healing? A multiscale model. *J. Theor. Biol.*, 365:247–264, 2015.
- [17] P Castro-Sánchez and P Roda-Navarro. *8. Role of CD4+ T cells in Rheumatoid Arthritis, Physiology and Pathology of Immunology*, pages 149–171. INTECH Open, 2017.
- [18] H Cha, S Rosengren, D L Boyle, and G S Firestein. PUMA regulation and proapoptotic effects in fibroblast-like synoviocytes. *Arthritis Rheum.*, 54(2):587–592, 2006.
- [19] M S Chimenti, P Triggianese, P Conigliaro, E Candi, G Melino, and R Perricone. The interplay between inflammation and metabolism in rheumatoid arthritis. *Cell Death Dis.*, 6(9):e1887, 2015.
- [20] R C Cockrell and G An. Examining the controllability of sepsis using genetic algorithms on an agent-based model of systemic inflammation. *PLoS Comp. Biol.*, 14(2):e1005876, 2018.
- [21] A P Croft, A J Naylor, J L Marshall, D L Hardie, B Zimmermann, J Turner, G Desanti, H Adams, AI Yemm, U Müller-Ladner, et al. Rheumatoid synovial fibroblasts differentiate into distinct subsets in the presence of cytokines and cartilage. *Arthritis Res. Ther.*, 18(1):1–11, 2016.
- [22] J R Curtis and J A Singh. Use of biologics in rheumatoid arthritis: Current and emerging paradigms of care. *Clin. Therap.*, 33(6):679–707, 2011.
- [23] M Cutolo, A Sulli, C Pizzorni, Bm Seriola, and Rainer H Straub. Anti-inflammatory mechanisms of methotrexate in rheumatoid arthritis. *Ann. Rheum. Dis.*, 60(8):729–735, 2001.
- [24] M J H de Hair, J W G Jacobs, J L M Schoneveld, and J M van Laar. Difficult-to-treat rheumatoid arthritis: An area of unmet clinical need. *Rheumatology*, 57(7):1135–1144, 2017.
- [25] C Deng, Q Zhang, P He, B Zhou, K He, X Sun, G Lei, T Gong, and Z Zhang. Targeted apoptosis of macrophages and osteoclasts in arthritic joints is effective against advanced inflammatory arthritis. *Nat. Commun.*, 12(1):1–15, 2021.
- [26] O.-I. Eseonu and C. De Bari. Homing of mesenchymal stem cells: Mechanistic or stochastic? Implications for targeted delivery in arthritis. *Rheumatology*, 54(2):210–218, 2015.
- [27] Z Fang, D He, B Yu, F Liu, J Zuo, Y Li, Q Lin, X Zhou, and Q Wang. High-throughput study of the effects of celastrol on activated fibroblast-like synoviocytes from patients with rheumatoid arthritis. *Genes*, 8(9):221, 2017.
- [28] G S Firestein and I B McInnes. Immunopathogenesis of rheumatoid arthritis. *Immunity*, 46(2):183–196, 2017.
- [29] D A Fox, A Gizinski, R Morgan, and S K Lundy. Cell-cell interactions in rheumatoid arthritis synovium. *Rheumatic Dis. Clinics*, 36(2):311–323, 2010.
- [30] L C Franssen and M A J Chaplain. A mathematical multi-organ model for bidirectional epithelial–mesenchymal transitions in the metastatic spread of cancer. *J. Appl. Math.*, 85(5):724–761, 2020.
- [31] R A Freitas. *Nanomedicine, Volume I: Basic Capabilities*, volume 1. Landes Bioscience Georgetown, TX, 1999.
- [32] L Geris. In silico tools predict effects of drugs on bone remodelling. *Nat. Rev. Rheumatol.*, 16(9):475–476, 2020.
- [33] E C Goligher, J Duryea, M H Liang, F Wolfe, and A Finckh. Radiographic joint space width in the fingers of patients with rheumatoid arthritis of less than one year’s duration. *Arthritis Rheumatol.*, 54(5):1440–1443, 2006.
- [34] W Grassi, R De Angelis, G Lamanna, and C Cervini. The clinical features of rheumatoid arthritis. *Eur. J. Radiol.*, 27:S18–S24, 1998.
- [35] Q Guo, Y Wang, D Xu, J Nossent, N J Pavlos, and J Xu. Rheumatoid arthritis: Pathological mechanisms and modern pharmacologic therapies. *Bone Res.*, 6(1):15, 2018.
- [36] S Hamis, S Stratiev, and G G Powathil. Uncertainty and sensitivity analyses methods for agent-based mathematical models: An introductory review. *The Physics of Cancer: Research Advances*, pages 1–37, 2021.

- [37] W Hao, E D Crouser, and A Friedman. Mathematical model of sarcoidosis. *Proc. Nat. Acad. Sci.*, 111(45):16065–16070, 2014.
- [38] B Heidari. Rheumatoid arthritis: Early diagnosis and treatment outcomes. *Caspian J. Intern. Med.*, 2(1):161, 2011.
- [39] P S Helliwell, J Hetthen, K Sokoll, M Green, A Marchesoni, E Lubrano, D Veale, and P Emery. Joint symmetry in early and late rheumatoid and psoriatic arthritis: Comparison with a mathematical model. *Arthritis Rheum.*, 43(4):865–871, 2000.
- [40] S Hong, H Marotte, G Courbon, G S Firestein, P Boulanger, and P Miossec. PUMA gene delivery to synoviocytes reduces inflammation and degeneration of arthritic joints. *Nat. Commun.*, 8(1):1–12, 2017.
- [41] P Italiani and D Boraschi. From monocytes to M1/M2 macrophages: Phenotypical vs. functional differentiation. *Front. Immunol.*, 5:514, 2014.
- [42] M Jit, B Henderson, M Stevens, and R M Seymour. TNF- $\alpha$  neutralisation in cytokine-driven diseases: A mathematical model to account for therapeutic success in rheumatoid arthritis but therapeutic failure in systemic inflammatory response syndrome. *Rheumatology*, 44(3):323–331, 2005.
- [43] G Kerckhofs, J Sainz, M Maréchal, M Wevers, T Van de Putte, L Geris, and J Schrooten. Contrast-enhanced nanofocus X-ray computed tomography allows virtual three-dimensional histopathology and morphometric analysis of osteoarthritis in small animal models. *Cartilage*, 5(1):55–65, 2014.
- [44] Y Kim, S Lawler, M O Nowicki, E A Chiocca, and A Friedman. A mathematical model for pattern formation of glioma cells outside the tumor spheroid core. *J. Theor. Biol.*, 260(3):359–371, 2009.
- [45] K. Kimura, R. Takayanagi, H. Yokoyama, and Y. Yamada. Theory-based analysis of anti-inflammatory effect of infliximab on Crohn’s disease and rheumatoid arthritis. *Rheumatol. Int.*, 32(1):145–150, 2012.
- [46] K. Kimura, R. Takayanagi, H. Yokoyama, and Y. Yamada. Theory-based analysis of the anti-inflammatory effect of TNF inhibitors on rheumatoid arthritis. *Drug. Metab. Pharmacokinet.*, 29(3):272–277, 2014.
- [47] G. Kobelt, P. Lindgren, A. Singh, and L. Klareskog. Cost effectiveness of etanercept (Enbrel) in combination with methotrexate in the treatment of active rheumatoid arthritis based on the TEMPO trial. *Ann. Rheum. Dis.*, 64:1174–1179, 2005.
- [48] F Krombach, S Münzing, A M Allmeling, J T Gerlach, J Behr, and M Dörger. Cell size of alveolar macrophages: An interspecies comparison. *Environ. Health Perspect.*, 105(suppl 5):1261–1263, 1997.
- [49] J Lammens, M Maréchal, H Delpont, L Geris, H Oppermann, S Vukicevic, and F P Luyten. A cell-based combination product for the repair of large bone defects. *Bone*, 138:115511, 2020.
- [50] I. Lekander, G. Kobelt, P. Svarvar, T. Ljung, R. van Vollenhoven, and F. Borgström. The comparison of trial data-based and registry data-based cost-effectiveness of Infliximab treatment for rheumatoid arthritis in Sweden using a modeling approach. *Value Health*, 16:251–258, 2013.
- [51] R J LeVeque. *Finite difference methods for ordinary and partial differential equations: Steady-state and time-dependent problems*. SIAM, 2007.
- [52] M. Levi, S. Grange, and N. Frey. Exposure-response relationship of tocilizumab, and anti-IL-6 receptor monoclonal antibody, in a large population of patients with rheumatoid arthritis. *J. Clin. Pharmacol.*, 53(2):151–159, 2013.
- [53] K Liao, X Bai, and A Friedman. Mathematical modeling of interleukin-27 induction of anti-tumor T cells response. *PLoS One*, 9(3):e91844, 2014.
- [54] D.-Y. Liu, H.-K. Lon, Y.-L. Wang, D.-C. DuBois, R.-A. Almon, and W.-J. Jusko. Pharmacokinetics, pharmacodynamics, and toxicities of methotrexate in healthy and collagen-induced arthritic rats. *Biopharm. Drug Dispos.*, 34(4):203–214, 2013.
- [55] C H Lo, E Baratchart, D Basanta, and C C Lynch. Computational modeling reveals a key role for polarized myeloid cells in controlling osteoclast activity during bone injury repair. *Sci. Rep.*, 11(1):1–14, 2021.

- [56] M A Lopez-Olivo, H R Siddhanamatha, B Shea, P Tugwell, G A Wells, and M E Suarez-Almazor. Methotrexate for treating rheumatoid arthritis. *Cochrane Database of Systematic Reviews*, (6), 2014.
- [57] J S Lowengrub, H B Frieboes, F Jin, Y L Chuang, X Li, P Macklin, S M Wise, and V Cristini. Nonlinear modelling of cancer: Bridging the gap between cells and tumours. *Nonlinearity*, 23(1):R1, 2009.
- [58] F R Macfarlane, M A J Chaplain, and R Eftimie. Quantitative predictive modelling approaches to understanding rheumatoid arthritis: A brief review. *Cells*, 9(1):74, 2020.
- [59] F R Macfarlane, M A J Chaplain, and T Lorenzi. A hybrid discrete-continuum approach to model Turing pattern formation. *Math. Biosci. Eng.*, 17(6):7442–7479, 2020.
- [60] P Macklin and M E Edgerton. Discrete cell modeling. In V Cristini and J S Lowengrub, editors, *Multiscale modelling of cancer: An integrated experimental and mathematical modeling approach*, pages 88–122. Cambridge University Press, 2010.
- [61] C K Macnamara. Biomechanical modelling of cancer: Agent-based force-based models of solid tumours within the context of the tumour microenvironment. *Comput. Syst. Oncol.*, 1(2):e1018, 2021.
- [62] M L Martins, S C Ferreira Jr, and M J Vilela. Multiscale models for biological systems. *Curr. Opin. Colloid Interface Sci.*, 15(1-2):18–23, 2010.
- [63] L Matteucci and M C Nucci. Solution of a mathematical model for the treatment of rheumatoid arthritis. *Commun. Appl. Ind. Math*, 10(2):12–24, 2019.
- [64] M Mellado, L Martínez-Muñoz, G Cascio, P Lucas, J L Pablos, and J M Rodríguez-Frade. T cell migration in rheumatoid arthritis. *Front. Immunol.*, 6:384, 2015.
- [65] Q Miagoux, V Singh, D de Mézquita, V Chaudru, M Elati, E Petit-Teixeira, and A Niarakis. Inference of an integrative, executable network for Rheumatoid Arthritis combining data-driven machine learning approaches and a state-of-the-art mechanistic disease map. *J. Personal. Med.*, 11(8):785, 2021.
- [66] N Moise and A Friedman. Rheumatoid arthritis - A mathematical model. *J. Theor. Biol.*, 461:17–33, 2019.
- [67] D.-R. Mould, C.-B. Davis, E.-A. Minthorn, D.-C. Kwok, M.-J. Elliott, M.-E. Luggen, and M.-C. Totoritis. A population pharmacokinetic-pharmacodynamic analysis of single doses of clenoliximab in patients with rheumatoid arthritis. *Pharmacokinet. Drug Dispos.*, 66(3):246–257, 1999.
- [68] M J Mousavi, J Karami, M N Aslani, Sand Tahmasebi, A S Vaziri, A Jamshidi, E Farhadi, and M Mahmoudi. Transformation of fibroblast-like synoviocytes in rheumatoid arthritis; from a friend to foe. *Autoimmun.*, 12(1):1–13, 2021.
- [69] J Mucke, A Hoyer, R Brinks, E Bleck, T Pauly, M Schneider, and S Vordenbäumen. Inhomogeneity of immune cell composition in the synovial sublining: Linear mixed modelling indicates differences in distribution and spatial decline of CD68+ macrophages in osteoarthritis and rheumatoid arthritis. *Arth. Res. Ther.*, 18(1):1–10, 2016.
- [70] T Nakajima, H Aono, T Hasunuma, K Yamamoto, T Shirai, K Hirohata, and K Nishioka. Apoptosis and functional Fas antigen in rheumatoid arthritis synoviocytes. *Arthritis Rheumat.*, 38(4):485–491, 1995.
- [71] J L Nam, K Takase-Minegishi, S Ramiro, K Chatzidionysiou, J S Smolen, D Van Der Heijde, J W Bijlsma, G R Burmester, M Dougados, M Scholte-Voshaar, et al. Efficacy of biological disease-modifying antirheumatic drugs: a systematic literature review informing the 2016 update of the EULAR recommendations for the management of rheumatoid arthritis. *Ann. Rheum. Dis.*, 76(6):1113–1136, 2017.
- [72] F. Namour, P.-M. Diderichsen, E. Cox, B. Vayssière, A. Van der Aa, C. Tasset, and G. Van’t Klooster. Pharmacokinetics and pharmacokinetic/pharmacodynamic modelling of filgotinib (GLPG0634), a selective JAK1 inhibitor, in support of phase IIB dose selection. *Clin. Pharmacokinet.*, 54:859–874, 2015.
- [73] National Rheumatoid Arthritis Society. What is RA? <https://www.nras.org.uk/what-is-ra-article>. Accessed: 2019-11-01.

- [74] C.-M. Ng, R. Bruno, D. Combs, and B. Davies. Population pharmacokinetics of rituximab (anti-CD20 monoclonal antibody) in rheumatoid arthritis patients during a phase II clinical trial. *J. Clin. Pharmacol.*, 45(7):792–801, 2005.
- [75] NHS Choices. Rheumatoid Arthritis. <https://www.nhs.uk/conditions/rheumatoid-arthritis/>. Accessed: 2019-10-01.
- [76] G Nygaard and G S Firestein. Restoring synovial homeostasis in rheumatoid arthritis by targeting fibroblast-like synoviocytes. *Nat. Rev. Rheumatol.*, 16(6):316–333, 2020.
- [77] K Odisharia, V Odisharia, P Tsereteli, and N Janikashvili. On the mathematical model of drug treatment of rheumatoid arthritis. In *International Conference on Applications of Mathematics and Informatics in Natural Sciences and Engineering*, pages 161–168. Springer, 2017.
- [78] Y Okuda. Review of tocilizumab in the treatment of rheumatoid arthritis. *Biol. Targets Ther.*, 2(1):75, 2008.
- [79] L Ouboussad, A N Burska, A Melville, and M H Buch. Synovial tissue heterogeneity in rheumatoid arthritis and changes with biologic and targeted synthetic therapies to inform stratified therapy. *Front. Med.*, 6:45, 2019.
- [80] G G Powathil, M Swat, and M A J Chaplain. Systems oncology: Towards patient-specific treatment regimes informed by multiscale mathematical modelling. In *Sem. Cancer Biol.*, volume 30, pages 13–20. Elsevier, 2015.
- [81] G Qian and A Mahdi. Sensitivity analysis methods in the biomedical sciences. *Math. Biosci.*, 323:108306, 2020.
- [82] R Rao, D DuBois, R Almon, William J Jusko, and I P Androulakis. Mathematical modelling of the circadian dynamics of the neuroendocrine-immune network in experimentally induced arthritis. *Am. J. Physiol. Endocrinol. Metab.*, 311(2):E310–E324, 2016.
- [83] K A Rejniak and A R A Anderson. Hybrid models of tumor growth. *WIREs Syst. Biol. Med.*, 3(1):115–125, 2011.
- [84] P.-J. Roberts-Thompson, M.-E. Jones, J.-G. Walker, J.-G. Macfarlane, M.-D. Smith, and M.-J. Ahem. Stochastic processes in the causation of rheumatic disease. *J. Rheumatol.*, 29(12):2628–2634, 2002.
- [85] J A C Rullmann, H Struemper, N A Defranoux, S Ramanujan, C M L Meeuwisse, and A Van Elsas. Systems biology for battling rheumatoid arthritis: Application of the Entelos PhysioLab platform. *IEE Proceedings-Systems Biology*, 152(4):256–262, 2005.
- [86] M S Saltzherr, G S R Muradin, I K Haugen, R W Selles, J W van Neck, J H Coert, J M W Hazes, and J J Luime. Cartilage evaluation in finger joints in healthy controls and early hand osteoarthritis patients using high-resolution MRI. *Osteoarthr. Cartil.*, 27(8):1148–1151, 2019.
- [87] S Sardar and Å Andersson. Old and new therapeutics for rheumatoid arthritis: In vivo models and drug development. *Immunopharmacol. Immunotoxicol.*, 38(1):2–13, 2016.
- [88] O Schenk, Y Huo, K L Vincken, M A van de Laar, I H H Kuper, K C H Slump, F P J G Lafeber, and H B J B Moens. Validation of automatic joint space width measurements in hand radiographs in rheumatoid arthritis. *J. Med. Imaging*, 3(4):044502, 2016.
- [89] L.-G. Schipper, W. Kievit, A.-A. den Broeder, M.-A. van der Laar, E.-M.-M Adang, J. Fransen, and P.-L.-C.-M van Riel. Treatment strategies aiming at remission in early rheumatoid arthritis patients: Starting with methotrexate monotherapy is cost-effective. *Rheumatology*, 50:1320–1330, 2011.
- [90] S. Scholz and T. Mittendorf. Modelling rheumatoid arthritis using different techniques - A review of model construction and results. *Health Econ. Rev.*, 4:18, 2014.
- [91] R Shields, R F Brooks, P N Riddle, D F Capellaro, and D Delia. Cell size, cell cycle and transition probability in mouse fibroblasts. *Cell*, 15(2):469–474, 1978.
- [92] J A Singh, C Cameron, S Noorbaloochi, Tyler Cullis, M Tucker, R Christensen, E T Ghogomu, D Coyle, T Clifford, P Tugwell, et al. Risk of serious infection in biological treatment of patients with rheumatoid arthritis: A systematic review and meta-analysis. *The Lancet*, 386(9990):258–265, 2015.

- [93] D W Smith, B S Gardiner, J B Davidson, and A J Grodzinsky. Computational model for the analysis of cartilage and cartilage tissue constructs. *J. Tissue Eng. Regen. Med.*, 10(4):334–347, 2016.
- [94] J.-R. Spalding and J. Hay. Cost effectiveness of tumour necrosis factor- $\alpha$  inhibitors as first-line agents in rheumatoid arthritis. *Pharmacoeconomics*, 24(12):1221–1232, 2006.
- [95] D. Ternant, E. Ducourau, A. Perdriger, A. Corondan, B. Le Goff, V. Devauchelle-Pensec, E. Solau-Gervais, H. Watier, P. Goupille, G. Paintaud, and D. Mulleman. Relationship between inflammation and infliximab pharmacokinetics in rheumatoid arthritis. *Br. J. Clin Pharmacol*, 78(1):118–128, 2013.
- [96] C Triaille, L Vansteenkiste, M Constant, J Ambroise, L Méric de Bellefon, A Nzeusseu Toukap, T Sokolova, C Galant, Pierre Coulie, J Carrasco, et al. Paired rheumatoid arthritis synovial biopsies from small and large joints show similar global transcriptomic patterns with enrichment of private specificity TCRB and TCR signaling pathways. *Front. Immunol.*, 11:2998, 2020.
- [97] I A Udalova, A Mantovani, and M Feldmann. Macrophage heterogeneity in the context of rheumatoid arthritis. *Nat. Rev. Rheum.*, 12(8):472, 2016.
- [98] C Urbach, N C Gordon, I Strickland, D Lowne, C Joberty-Candotti, R May, A Herath, D Hijnen, J L Thijs, C A Bruijnzeel-Koomen, et al. Combinatorial screening identifies novel promiscuous matrix metalloproteinase activities that lead to inhibition of the therapeutic target IL-13. *Chem. Biol.*, 22(11):1442–1452, 2015.
- [99] M G van de Sande and D L Baeten. Immunopathology of synovitis: From histology to molecular pathways. *Rheumatology*, 55(4):599–606, 2016.
- [100] P A D M Van Liedekerke, A Buttenschön, and D Drasdo. Off-lattice agent-based models for cell and tumor growth: Numerical methods, implementation, and applications. In *Numerical methods and advanced simulation in biomechanics and biological processes*, pages 245–267. Elsevier, 2018.
- [101] M C Wick, S Lindblad, L Klareskog, and R F Van Vollenhoven. Relationship between inflammation and joint destruction in early rheumatoid arthritis: A mathematical description. *Ann. Rheum. Dis.*, 63(7):848–852, 2004.
- [102] K L Winthrop, M E Weinblatt, J Bathon, G R Burmester, P J Mease, L Crofford, V Bykerk, M Dougados, J T Rosenbaum, X Mariette, et al. Unmet need in rheumatology: Reports from the targeted therapies meeting 2019. *Annal. Rheum. Dis.*, 79(1):88–93, 2020.
- [103] T.-M. Witten, I. del Rincon, and A. Escalante. Modelling the progression of articular erosion in rheumatoid arthritis (RA): Initial mathematical models. *Math. Comput. Model.*, 31:31–38, 2000.
- [104] J Wollbold, R Huber, D Pohlers, D Koczan, R Guthke, R W Kinne, and U Gausmann. Adapted Boolean network models for extracellular matrix formation. *BMC Sys. Biol.*, 3(1):1–19, 2009.
- [105] X Yang, Y Chang, and W Wei. Emerging role of targeting macrophages in rheumatoid arthritis: Focus on polarization, metabolism and apoptosis. *Cell Prolif.*, 53(7):e12854, 2020.
- [106] M E Young, P A Carroad, and R L Bell. Estimation of diffusion coefficients of proteins. *Biotech, Bioeng.*, 22(5):947–955, 1980.



## A Discretisation of PDEs

We require an on-lattice approach for numerical simulations of the PDE components of the model, to perform simulation we discretise the PDEs in space and time to allow for this. We consider the lattice to have spatial index positions  $i \in [1, \dots, N_x]$  and  $j \in [1, \dots, N_y]$ , and consider the time to be discretised so that the time-step  $k = t/\Delta_{tchem}$  where  $\Delta_{tchem}$  is some time-step length. We can then discretise the PDE in Equation (2.1) using a explicit form to be written as,

$$c_{MMP_i}^{k+1} = c_{MMP_i}^k + \Delta_{tchem} (\lambda_{CMMP} \mathcal{L}(c_{MMP_i}^k) + (\beta_F \rho_{F_i}^k + \beta_M \rho_{M_i}^k) (1 - c_{MMP_i}^k) - \kappa_{CMMP} c_{MMP_i}^k), \quad (A.1)$$

where  $c_{MMP_i}^k$  is the concentration of MMP at spatial position  $\mathbf{i}$  at time-step  $k$ ,  $\Delta_{tchem}$  is the time-step length and  $\mathcal{L}$  is the finite difference Laplacian, such that,

$$\mathcal{L}(c_{MMP_i}^k) = \frac{c_{MMP_{(i+1,j)}}^k + c_{MMP_{(i-1,j)}}^k - 2c_{MMP_{(i,j)}}^k}{\Delta_{xchem}^2} + \frac{c_{MMP_{(i,j+1)}}^k + c_{MMP_{(i,j-1)}}^k - 2c_{MMP_{(i,j)}}^k}{\Delta_{ychem}^2}.$$

Here,  $\Delta_{xchem}$  and  $\Delta_{ychem}$  are the space-step lengths in the  $x$  and  $y$  direction, respectively. Similarly, the discrete forms of bone and cartilage equations Equations (2.2) and (2.3), can be written as,

$$\rho_{C_i}^{k+1} = \rho_{C_i}^k - \Delta_{tchem} \kappa_{\rho_C} \rho_{C_i}^k c_{MMP_i}^k, \quad (A.2)$$

$$\rho_{B_i}^{k+1} = \rho_{B_i}^k - \Delta_{tchem} \kappa_{\rho_B} \rho_{B_i}^k c_{MMP_i}^k, \quad (A.3)$$

where  $\rho_{C_i}^k$  and  $\rho_{B_i}^k$  are the densities of cartilage and bone at spatial position  $\mathbf{i}$  at time-step  $k$ , and  $\Delta_{tchem}$  is the time-step length.

## B Code availability

The full code used to perform the numerical simulations in MATLAB is available upon request via email to the corresponding author or can be accessed on GitHub at: <https://github.com/frm3-st-andrews/Arthritis>.

## C Parameter estimation

### C.1 Time and space-steps of numerical simulations

For the off-lattice description of cells we arbitrarily choose the time-step of simulations to be,

$$\Delta_{tcells} = 1 \times 10^{-2} \text{ days.}$$

For the discretised PDEs describing MMPs, cartilage and bone we impose a time-step  $\Delta_{tchem}$  and space-steps in the  $x$  and  $y$  spatial directions,  $\Delta_{x,y}$ , for the numerical simulations such that the finite difference method [51] used to solve the equations are stable. We choose,

$$\Delta_{tchem} = 1 \times 10^{-4} \text{ days,} \quad \Delta_x = \Delta_y = 1 \times 10^{-3} \text{ cm.}$$

Note that, we choose a different time-step for the deterministic part of the model than the stochastic. This choice is made to speed up the simulations where possible, as a smaller time-step is not required for the stochastic parts.

### C.2 Set-up of the spatial domain

We define the full domain of the grid to be  $x \in [x_l, x_h]$  and  $y \in [y_l, y_h]$ . We consider the length of the domain in the  $y$  direction depends on the choices of the sub-domain sizes described in Table 1. Therefore we set,

$$x_l = y_l = 0 \text{ cm,} \quad x_h = 0.3 \text{ cm and } y_h = W_J + 2W_C + 2W_B \text{ cm.}$$

We arbitrarily choose the height of bone in the  $y$  direction protruding into the top and bottom of the domain to be,

$$W_B = 0.1 \text{ cm.}$$

In [86], the authors use high resolution MRI (magnetic resonance imaging ) to evaluate the cartilage of the 2nd and 3rd, metacarpophalangeal (MCP) and proximal interphalangeal (PIP) joints in hand osteoarthritis patients and healthy controls. Based in the Netherlands, 41 OA patients and 18 healthy controls were evaluated. The patients were all female, the OA patients were between 40-80 years old, while the healthy individuals were between 18-31 years old. For healthy controls the cartilage thickness in the PIP joint varied between 0.2mm and 0.7mm, with a mean of 0.4mm and standard deviation of 0.1mm. This mean and standard deviation was the same with the OA patients, but they exhibited higher levels of variation. Therefore, we consider that prior to pannus formation, the cartilage width in our simulated PIP joint will be approximately 0.4mm, as this was the average of healthy controls. Therefore, we consider the cartilage to be uniform width surrounding the bone and set,

$$W_C = 0.04 \text{ cm.}$$

In [33], the authors use radiographs to assess the joint space width (JSW) in undamaged MCP and PIP joints of patients with early rheumatoid arthritis (RA). The mean JSW of the 4 fingers on both hands was measured for the each of the 38 patients that were assessed. The cohort was made up of 29 females and 9 males, 13 patients were under 50 years old, 8 patients were 50-60 years old, and 17 were over 60 years old. In the males the average joint space width was 1.28 mm ( $\pm 0.1$ mm for the 95% confidence interval), while females were 0.99mm ( $\pm 0.05$ mm). The averages between the age groups were all roughly the same, (1.1mm, 1.06mm, 1.02mm, respectively). Similarly, in [88] the authors use radiographs to validate the joint space width (JSW) calculations in undamaged MCP and PIP joints of patients with early rheumatoid arthritis (RA). Two dutch data sets were used to validate the method, where radiographs were taken every 6 months of the patients. They authors use data from the 4 fingers on each hand, of each patient (omitting the thumbs). For the 1st data set, the average PIP joint in undamaged cases (527 images tested) was  $1 \pm 0.2$  mm, while in the 2nd data set (570 images tested) the average was  $0.9 \pm 0.2$ mm. Therefore, we consider that prior to pannus formation, in our simulated PIP joint we would expect the initial joint width to be approximated as,

$$W_J = 0.01 \text{ cm,}$$

where we assume the spacing to be uniform across the width of the joint. In health, the synovial membrane contains relatively few cells consisting of an intimal layer of 1-2 cell thickness and a distinct sublining [79]. Therefore we initially want to allow around 2 layers of cells in the membrane, so we choose

$$W_M = 0.004 \text{ cm,}$$

This value is set so that an approximate maximum thickness of two macrophages is possible for the cell membrane. We arbitrarily then choose the space between the cartilage and the edge of the domain in the  $x$ -direction to be,

$$W_S = 2W_M \text{ cm.}$$

### C.3 Cell parameters

**Cell radii** In [48], the authors show that the average diameter of human alveolar macrophages from the lung of 10 participants was  $21.2 \pm 0.3 \mu\text{m}$  in diameter. They also highlight that the diameter of human macrophages is much large than that of other species. Furthermore, in [31] it was shown that the average diameter of a fibroblast is between  $10\text{-}15 \mu\text{m}$ , while for a macrophage the average diameter can be as large as  $20\text{-}80 \mu\text{m}$ . Therefore, we choose the diameter of a macrophage to be approximately  $21 \mu\text{m}$  and the diameter of a fibroblast to be approximately  $13 \mu\text{m}$ , that is we set,

$$R_M \approx \frac{21}{2} \mu\text{m} = 10.5 \times 10^{-4} \text{ cm} \quad \text{and} \quad R_F \approx \frac{13}{2} \mu\text{m} = 6.5 \times 10^{-4} \text{ cm.}$$

**Initial condition** In a healthy joint, the intimal layer of the membrane is generally 1-2 cells thick and consists of fibroblast-like synoviocytes (FLSs) and macrophage-like synoviocytes (MLSs) evenly distributed and in equal amounts [8, 79]. Therefore we set the initial number of both cell types to be equal as,

$$N_F(0) = 200 \text{ cells} \quad \text{and} \quad N_M(0) = 200 \text{ cells.}$$

**Cell division** In [27], the authors study the effects of celastrol, and anti-inflammatory chemical, on the proliferation rates of fibroblast-like synoviocytes from RA patients. In the untreated case the approximate doubling time of FLSs is 2.1 days. This can be used to estimate an approximate growth rate through the equation for exponential growth,  $D_T = \frac{70}{r}$ , with  $D_T$  being the doubling time and  $r$  the % growth rate. Using this we can estimate the FLSs will have

a proliferation rate of approximately  $0.33 \text{ day}^{-1}$ , which corresponds to the probability of a fibroblast dividing at any time-step as,

$$\alpha_F \approx 0.33\Delta_{tcells}.$$

The authors in [66] also use a similar value for fibroblast division and estimate that macrophage division will be similar. Therefore, we use in our simulations that,

$$\alpha_M = \alpha_F = 0.33\Delta_{tcells}.$$

Note, that these probabilities are within the context of the cell having available space. As macrophages are larger than fibroblasts, they are less likely to find available space to divide within the simulations, and therefore the probability of a macrophage dividing will be inherently lower than that of fibroblasts. This is consistent with the suggestion that while the proliferation of both macrophages and fibroblasts within the pannus increases, fibroblasts may exhibit a particularly aggressive phenotype and have higher proliferation rates [11, 14, 68].

**Cell death** In [70], the authors use experimental methods to detect apoptotic cell death in synovial tissues biopsied from 6 patients with RA, and 3 with OA as controls. They found that 30% of the RA fibroblast like-synoviocytes were susceptible to apoptosis. The authors of [66], use this value and the assumption that apoptosis takes 24hrs to estimate that the apoptosis rate of fibroblast like-synoviocytes is around  $0.3 \text{ day}^{-1}$ . This would lead to the probability of a fibroblast undergoing apoptosis to be,

$$\kappa_F = 0.3\Delta_{tcells}.$$

This value results in proliferation and decay being very close (similar to a homeostatic situation) but leads to extinction due to stochasticity. At the moment we choose a value of 10% of this, to prevent fibroblast extinction and assume the value would be similar to macrophage apoptosis rates. In the review paper [41], the authors discuss the key phenotypes of monocytes and macrophages. Specifically, they discuss mouse model results, where Ly6C+ intestinal monocytes that have a half-life of 3 weeks. The authors of [66], use this mouse model value and assume that apoptosis of macrophages occurs at the rate of  $0.033 \text{ day}^{-1}$ . Therefore, we set the probability of a macrophage undergoing apoptosis to be,

$$\kappa_M = 0.033\Delta_{tcells}.$$

**Cell migration** In many mathematical modelling works animal cell movement is estimated to be of order  $1 \times 10^{-11} \text{ cm}^2 \text{ sec}^{-1}$  [37, 44, 53, 66, 106]. This estimate translates to a diffusion rate of  $8.64 \times 10^{-7} \text{ cm}^2 \text{ day}^{-1}$ , which through scaling corresponds to a probability of moving of  $\frac{\Delta_{tchem}}{\Delta_{xcells}^2} 8.64 \times 10^{-7}$ . Therefore, we set for fibroblasts,

$$\lambda_F = \frac{\Delta_{tcells}}{\Delta_x^2} 8.64 \times 10^{-7},$$

and similarly for macrophages,

$$\lambda_M = \frac{\Delta_{tcells}}{\Delta_x^2} 8.64 \times 10^{-7}.$$

We note that these are just estimates and, as macrophages are larger, they may have a lower movement probability. Also note that  $\lambda$  is not the total probability, but contributes to this probability as we also consider a volume exclusion process whereby cells cannot overlap in space with each other or with cartilage or bone. This probability relies on  $\Delta_{tchem}$  and  $\Delta_{xcells} = \Delta_x$  which have to be chosen such that  $\lambda \leq 1$ .

## C.4 Parameters for MMPs, cartilage and bone

**MMP secretion rates of cells** In the mathematical model described in [66], the authors estimate the MMP secretion rates of both fibroblasts and macrophages. For our initial simulations we use these values and set,

$$\beta_F = 13.912 \times 10^{-5} \Delta_{tcells} \quad \text{and} \quad \beta_M = 5.2717 \times 10^{-5} \Delta_{tcells}.$$

**Diffusion and decay of MMPs** The parameters for the mechanisms of MMPs in the joint are taken to be those used in [66]. They estimate the diffusion rate of MMPs, using [106], to be,

$$\lambda_{CMMP} = 6.59 \times 10^{-2} \text{ cm}^2 \text{ day}^{-1}.$$

Furthermore, they estimate, using [98], the natural decay rate of MMPs to be,

$$\kappa_{CMMP} = 0.138 \text{ day}^{-1}.$$

**Degradation of cartilage and bone by MMPs** In [66], they only consider cartilage degradation, which they estimate to occur at the rate,

$$\kappa_{\rho_C} = \frac{4.44 \times 10^3}{1.15} \rho_C(0) \text{ day}^{-1}.$$

We make the assumption that the decay rate of bone will be lower, and for simulations, take the value,

$$\kappa_{\rho_B} = \frac{\kappa_{\rho_C}}{10} = \frac{4.44 \times 10^3}{11.5} \rho_C(0) \text{ day}^{-1}.$$
